# Supplementary material for: PhageGE: an interactive web platform for exploratory analysis and visualization of bacteriophage genomes
Source: PubMed Central journal article supplement (PMC11423353; doi:10.1093/gigascience/giae074), 2024-09-25
Supplement: giae074_giga-d-24-00040_revision_2.pdf [file giae074_giga-d-24-00040_revision_2.pdf]

# GigaScience

## PhageGE: An interactive web platform for exploratory analysis and visualisation of bacteriophage genomes

--Manuscript Draft--

|                                                      |                                                                                                                                                                                                                                                                                                                                                                                                                                                                                                                                                                                                                                                                                                                                                                                                                                                                                                                                                                                                                                                                                                                                                                                                                                                                                                                                                                                                                                                                                                                                |              |
|------------------------------------------------------|--------------------------------------------------------------------------------------------------------------------------------------------------------------------------------------------------------------------------------------------------------------------------------------------------------------------------------------------------------------------------------------------------------------------------------------------------------------------------------------------------------------------------------------------------------------------------------------------------------------------------------------------------------------------------------------------------------------------------------------------------------------------------------------------------------------------------------------------------------------------------------------------------------------------------------------------------------------------------------------------------------------------------------------------------------------------------------------------------------------------------------------------------------------------------------------------------------------------------------------------------------------------------------------------------------------------------------------------------------------------------------------------------------------------------------------------------------------------------------------------------------------------------------|--------------|
| <b>Manuscript Number:</b>                            | GIGA-D-24-00040R2                                                                                                                                                                                                                                                                                                                                                                                                                                                                                                                                                                                                                                                                                                                                                                                                                                                                                                                                                                                                                                                                                                                                                                                                                                                                                                                                                                                                                                                                                                              |              |
| <b>Full Title:</b>                                   | PhageGE: An interactive web platform for exploratory analysis and visualisation of bacteriophage genomes                                                                                                                                                                                                                                                                                                                                                                                                                                                                                                                                                                                                                                                                                                                                                                                                                                                                                                                                                                                                                                                                                                                                                                                                                                                                                                                                                                                                                       |              |
| <b>Article Type:</b>                                 | Technical Note                                                                                                                                                                                                                                                                                                                                                                                                                                                                                                                                                                                                                                                                                                                                                                                                                                                                                                                                                                                                                                                                                                                                                                                                                                                                                                                                                                                                                                                                                                                 |              |
| <b>Funding Information:</b>                          | Division of Microbiology and Infectious Diseases, National Institute of Allergy and Infectious Diseases (R21 AI156766)                                                                                                                                                                                                                                                                                                                                                                                                                                                                                                                                                                                                                                                                                                                                                                                                                                                                                                                                                                                                                                                                                                                                                                                                                                                                                                                                                                                                         | Prof Jian Li |
| <b>Abstract:</b>                                     | <p>Background: Antimicrobial resistance is a serious threat to global health. Due to the stagnant antibiotic discovery pipeline, bacteriophages (phages) have been proposed as an alternative therapy for the treatment of infections caused by multidrug-resistant (MDR) pathogens. Genomic features play an important role in phage pharmacology. However, our knowledge of phage genomics is sparse and the use of existing bioinformatic pipelines and tools requires considerable bioinformatic expertise. These challenges have substantially limited the clinical translation of phage therapy.</p> <p>Findings: A user-friendly graphical interface application, PhageGE (Phage Genome Explorer), was developed for the interactive analysis of phage genomes. The new R Shiny webserver, PhageGE, was designed for analysing phage whole-genome sequence (WGS) data. PhageGE integrates several existing R packages and combines them with several newly developed functions to perform phylogeny analysis and lifestyle prediction. The webserver offers several additional key functions, including interactive phylogenetic tree visualisation and annotation comparison. The output from PhageGE can be exported directly with publication-quality images.</p> <p>Conclusions: PhageGE is a valuable tool for analysing phage genome data and may expedite the development and clinical translation of phage therapy. PhageGE is publicly available at <a href="http://phagege.com/">http://phagege.com/</a>.</p> |              |
| <b>Corresponding Author:</b>                         | Jian Li<br>Monash Biomedicine Discovery Institute<br>AUSTRALIA                                                                                                                                                                                                                                                                                                                                                                                                                                                                                                                                                                                                                                                                                                                                                                                                                                                                                                                                                                                                                                                                                                                                                                                                                                                                                                                                                                                                                                                                 |              |
| <b>Corresponding Author Secondary Information:</b>   |                                                                                                                                                                                                                                                                                                                                                                                                                                                                                                                                                                                                                                                                                                                                                                                                                                                                                                                                                                                                                                                                                                                                                                                                                                                                                                                                                                                                                                                                                                                                |              |
| <b>Corresponding Author's Institution:</b>           | Monash Biomedicine Discovery Institute                                                                                                                                                                                                                                                                                                                                                                                                                                                                                                                                                                                                                                                                                                                                                                                                                                                                                                                                                                                                                                                                                                                                                                                                                                                                                                                                                                                                                                                                                         |              |
| <b>Corresponding Author's Secondary Institution:</b> |                                                                                                                                                                                                                                                                                                                                                                                                                                                                                                                                                                                                                                                                                                                                                                                                                                                                                                                                                                                                                                                                                                                                                                                                                                                                                                                                                                                                                                                                                                                                |              |
| <b>First Author:</b>                                 | Jinxin Zhao, Ph.D.                                                                                                                                                                                                                                                                                                                                                                                                                                                                                                                                                                                                                                                                                                                                                                                                                                                                                                                                                                                                                                                                                                                                                                                                                                                                                                                                                                                                                                                                                                             |              |
| <b>First Author Secondary Information:</b>           |                                                                                                                                                                                                                                                                                                                                                                                                                                                                                                                                                                                                                                                                                                                                                                                                                                                                                                                                                                                                                                                                                                                                                                                                                                                                                                                                                                                                                                                                                                                                |              |
| <b>Order of Authors:</b>                             | Jinxin Zhao, Ph.D.                                                                                                                                                                                                                                                                                                                                                                                                                                                                                                                                                                                                                                                                                                                                                                                                                                                                                                                                                                                                                                                                                                                                                                                                                                                                                                                                                                                                                                                                                                             |              |
|                                                      | Jiru Han, Ph.D.                                                                                                                                                                                                                                                                                                                                                                                                                                                                                                                                                                                                                                                                                                                                                                                                                                                                                                                                                                                                                                                                                                                                                                                                                                                                                                                                                                                                                                                                                                                |              |
|                                                      | Yu-Wei Lin, Ph.D.                                                                                                                                                                                                                                                                                                                                                                                                                                                                                                                                                                                                                                                                                                                                                                                                                                                                                                                                                                                                                                                                                                                                                                                                                                                                                                                                                                                                                                                                                                              |              |
|                                                      | Yan Zhu, Ph.D.                                                                                                                                                                                                                                                                                                                                                                                                                                                                                                                                                                                                                                                                                                                                                                                                                                                                                                                                                                                                                                                                                                                                                                                                                                                                                                                                                                                                                                                                                                                 |              |
|                                                      | Michael Aichem                                                                                                                                                                                                                                                                                                                                                                                                                                                                                                                                                                                                                                                                                                                                                                                                                                                                                                                                                                                                                                                                                                                                                                                                                                                                                                                                                                                                                                                                                                                 |              |
|                                                      | Dimitar Garkov                                                                                                                                                                                                                                                                                                                                                                                                                                                                                                                                                                                                                                                                                                                                                                                                                                                                                                                                                                                                                                                                                                                                                                                                                                                                                                                                                                                                                                                                                                                 |              |
|                                                      | Phillip J. Bergen, Ph.D.                                                                                                                                                                                                                                                                                                                                                                                                                                                                                                                                                                                                                                                                                                                                                                                                                                                                                                                                                                                                                                                                                                                                                                                                                                                                                                                                                                                                                                                                                                       |              |
|                                                      | Sue C. Nang, Ph.D.                                                                                                                                                                                                                                                                                                                                                                                                                                                                                                                                                                                                                                                                                                                                                                                                                                                                                                                                                                                                                                                                                                                                                                                                                                                                                                                                                                                                                                                                                                             |              |
|                                                      | Jian-Zhong Ye, Ph.D.                                                                                                                                                                                                                                                                                                                                                                                                                                                                                                                                                                                                                                                                                                                                                                                                                                                                                                                                                                                                                                                                                                                                                                                                                                                                                                                                                                                                                                                                                                           |              |
|                                                      |                                                                                                                                                                                                                                                                                                                                                                                                                                                                                                                                                                                                                                                                                                                                                                                                                                                                                                                                                                                                                                                                                                                                                                                                                                                                                                                                                                                                                                                                                                                                |              |

|                                                                                                                                                                                                                                                                                                                                                                                   |                                                                                                                                                                                                                                                                                                                                                                                                                                                                                                                                                                                                                                                                                                                                                                                                                                                                                                                                                                                                                                                                                                                                                                                                                                                                                                                                                                                                                                                                                                                                                                                       |
|-----------------------------------------------------------------------------------------------------------------------------------------------------------------------------------------------------------------------------------------------------------------------------------------------------------------------------------------------------------------------------------|---------------------------------------------------------------------------------------------------------------------------------------------------------------------------------------------------------------------------------------------------------------------------------------------------------------------------------------------------------------------------------------------------------------------------------------------------------------------------------------------------------------------------------------------------------------------------------------------------------------------------------------------------------------------------------------------------------------------------------------------------------------------------------------------------------------------------------------------------------------------------------------------------------------------------------------------------------------------------------------------------------------------------------------------------------------------------------------------------------------------------------------------------------------------------------------------------------------------------------------------------------------------------------------------------------------------------------------------------------------------------------------------------------------------------------------------------------------------------------------------------------------------------------------------------------------------------------------|
|                                                                                                                                                                                                                                                                                                                                                                                   | Tieli Zhou, Ph.D.                                                                                                                                                                                                                                                                                                                                                                                                                                                                                                                                                                                                                                                                                                                                                                                                                                                                                                                                                                                                                                                                                                                                                                                                                                                                                                                                                                                                                                                                                                                                                                     |
|                                                                                                                                                                                                                                                                                                                                                                                   | Tony Velkov, Ph.D.                                                                                                                                                                                                                                                                                                                                                                                                                                                                                                                                                                                                                                                                                                                                                                                                                                                                                                                                                                                                                                                                                                                                                                                                                                                                                                                                                                                                                                                                                                                                                                    |
|                                                                                                                                                                                                                                                                                                                                                                                   | Jiangning Song, Ph.D.                                                                                                                                                                                                                                                                                                                                                                                                                                                                                                                                                                                                                                                                                                                                                                                                                                                                                                                                                                                                                                                                                                                                                                                                                                                                                                                                                                                                                                                                                                                                                                 |
|                                                                                                                                                                                                                                                                                                                                                                                   | Falk Schreiber, Ph.D.                                                                                                                                                                                                                                                                                                                                                                                                                                                                                                                                                                                                                                                                                                                                                                                                                                                                                                                                                                                                                                                                                                                                                                                                                                                                                                                                                                                                                                                                                                                                                                 |
|                                                                                                                                                                                                                                                                                                                                                                                   | Jian Li, Ph.D.                                                                                                                                                                                                                                                                                                                                                                                                                                                                                                                                                                                                                                                                                                                                                                                                                                                                                                                                                                                                                                                                                                                                                                                                                                                                                                                                                                                                                                                                                                                                                                        |
| <b>Order of Authors Secondary Information:</b>                                                                                                                                                                                                                                                                                                                                    |                                                                                                                                                                                                                                                                                                                                                                                                                                                                                                                                                                                                                                                                                                                                                                                                                                                                                                                                                                                                                                                                                                                                                                                                                                                                                                                                                                                                                                                                                                                                                                                       |
| <b>Response to Reviewers:</b>                                                                                                                                                                                                                                                                                                                                                     | <p>Reviewers' comments:</p> <p>Reviewer1:</p> <p>1.I think it's important to state upfront in the abstract what phageGE can do (i.e., phylogenetic analysis, visualisation of phylo tree, predict phage lifecycle, and comparative analysis of phage genome annotations).<br/>Response: We thank the reviewer for the suggestion. We have revised the abstract accordingly (lines 49-59).</p> <p>2.Please include a link to the phageGE webpage in the abstract.<br/>Response: We thank the reviewer for the suggestion and have provided the webpage in the abstract (line 59).</p> <p>3.Spelling mistakes throughout the manuscript - as an example L288: comprehensive<br/>Response: We thank the reviewer for the suggestion and have carefully checked our manuscript (line 228).</p> <p>4..fna and .fasta are the same format. i.e., fna is a type of FASTA file. fna specifies that the fasta file specifically contains nucleotides (instead of amino acids).<br/>Response: We thank the reviewer for the suggestion and have revised our manuscript accordingly (lines 122, 590).</p> <p>5.change "biologist friendly" to "User friendly" - this is more a philosophical/psychological change. I think bioinformatics on the command-line should be accessible and something biologists can develop. I think calling GUI programs "biologist-friendly" will deter more biologists from learning bioinformatics.<br/>Response: We thank the reviewer for the suggestion. We have revised our manuscript accordingly, with changes made on lines 49, 89, 97, 219, and 261.</p> |
| <b>Additional Information:</b>                                                                                                                                                                                                                                                                                                                                                    |                                                                                                                                                                                                                                                                                                                                                                                                                                                                                                                                                                                                                                                                                                                                                                                                                                                                                                                                                                                                                                                                                                                                                                                                                                                                                                                                                                                                                                                                                                                                                                                       |
| <b>Question</b>                                                                                                                                                                                                                                                                                                                                                                   | <b>Response</b>                                                                                                                                                                                                                                                                                                                                                                                                                                                                                                                                                                                                                                                                                                                                                                                                                                                                                                                                                                                                                                                                                                                                                                                                                                                                                                                                                                                                                                                                                                                                                                       |
| Are you submitting this manuscript to a special series or article collection?                                                                                                                                                                                                                                                                                                     | No                                                                                                                                                                                                                                                                                                                                                                                                                                                                                                                                                                                                                                                                                                                                                                                                                                                                                                                                                                                                                                                                                                                                                                                                                                                                                                                                                                                                                                                                                                                                                                                    |
| <b>Experimental design and statistics</b>                                                                                                                                                                                                                                                                                                                                         | Yes                                                                                                                                                                                                                                                                                                                                                                                                                                                                                                                                                                                                                                                                                                                                                                                                                                                                                                                                                                                                                                                                                                                                                                                                                                                                                                                                                                                                                                                                                                                                                                                   |
| <p>Full details of the experimental design and statistical methods used should be given in the Methods section, as detailed in our <a href="#">Minimum Standards Reporting Checklist</a>. Information essential to interpreting the data presented should be made available in the figure legends.</p> <p>Have you included all the information requested in your manuscript?</p> |                                                                                                                                                                                                                                                                                                                                                                                                                                                                                                                                                                                                                                                                                                                                                                                                                                                                                                                                                                                                                                                                                                                                                                                                                                                                                                                                                                                                                                                                                                                                                                                       |
| <b>Resources</b>                                                                                                                                                                                                                                                                                                                                                                  | Yes                                                                                                                                                                                                                                                                                                                                                                                                                                                                                                                                                                                                                                                                                                                                                                                                                                                                                                                                                                                                                                                                                                                                                                                                                                                                                                                                                                                                                                                                                                                                                                                   |
| A description of all resources used,                                                                                                                                                                                                                                                                                                                                              |                                                                                                                                                                                                                                                                                                                                                                                                                                                                                                                                                                                                                                                                                                                                                                                                                                                                                                                                                                                                                                                                                                                                                                                                                                                                                                                                                                                                                                                                                                                                                                                       |

|                                                                                                                                                                                                                                                                                                                                                                                                                                                                                                                                                         |            |
|---------------------------------------------------------------------------------------------------------------------------------------------------------------------------------------------------------------------------------------------------------------------------------------------------------------------------------------------------------------------------------------------------------------------------------------------------------------------------------------------------------------------------------------------------------|------------|
| <p>including antibodies, cell lines, animals and software tools, with enough information to allow them to be uniquely identified, should be included in the Methods section. Authors are strongly encouraged to cite <a href="#">Research Resource Identifiers</a> (RRIDs) for antibodies, model organisms and tools, where possible.</p> <p>Have you included the information requested as detailed in our <a href="#">Minimum Standards Reporting Checklist</a>?</p>                                                                                  |            |
| <p><b>Availability of data and materials</b></p> <p>All datasets and code on which the conclusions of the paper rely must be either included in your submission or deposited in <a href="#">publicly available repositories</a> (where available and ethically appropriate), referencing such data using a unique identifier in the references and in the “Availability of Data and Materials” section of your manuscript.</p> <p>Have you have met the above requirement as detailed in our <a href="#">Minimum Standards Reporting Checklist</a>?</p> | <p>Yes</p> |

1 **PhageGE: An interactive web platform for exploratory analysis and visualisation**  
2 **of bacteriophage genomes**

3 Jinxin Zhao<sup>1, 2\*</sup>, Jiru Han<sup>3</sup>, Yu-Wei Lin<sup>1</sup>, Yan Zhu<sup>1, 4</sup>, Michael Aichem<sup>5</sup>, Dimitar Garkov<sup>5</sup>,  
4 Phillip J. Bergen<sup>1</sup>, Sue C. Nang<sup>1</sup>, Jian-Zhong Ye<sup>6, 7</sup>, Tieli Zhou<sup>6, 7</sup>, Tony Velkov<sup>8</sup>,  
5 Jiangning Song<sup>2, 9</sup>, Falk Schreiber<sup>5, 10</sup>, Jian Li<sup>1, 2\*</sup>

6 <sup>1</sup> Infection Program and Department of Microbiology, Biomedicine Discovery Institute,  
7 Monash University, Clayton, VIC, Australia

8 <sup>2</sup> Monash Biomedicine Discovery Institute-Wenzhou Medical University Alliance in  
9 Clinical and Experimental Biomedicine, Monash University, Clayton, VIC, Australia

10 <sup>3</sup> Population Health and Immunity Division, The Walter and Eliza Hall Institute of  
11 Medical Research, Parkville, VIC, Australia

12 <sup>4</sup> Systems Biology Center, Tianjin Institute of Industrial Biotechnology, Chinese  
13 Academy of Sciences, Tianjin, China

14 <sup>5</sup> Department of Computer and Information Science, University of Konstanz, Konstanz,  
15 Germany

16 <sup>6</sup> Key Laboratory of Clinical Laboratory Diagnosis and Translational Research of  
17 Zhejiang Province, Department of Clinical Laboratory, The First Affiliated Hospital of  
18 Wenzhou Medical University, Zhejiang, China

19 <sup>7</sup> Wenzhou Medical University-Monash Biomedicine Discovery Institute Alliance in  
20 Clinical and Experimental Biomedicine, The First Affiliated Hospital of Wenzhou  
21 Medical University, Wenzhou, China

22 <sup>8</sup> Department of Pharmacology, Biomedicine Discovery Institute, Monash University,  
23 Melbourne, VIC, Australia

24 <sup>9</sup> Department of Biochemistry and Molecular Biology, Biomedicine Discovery Institute,  
25 Monash University, Melbourne, VIC, Australia

26 <sup>10</sup> Faculty of Information Technology, Monash University, Clayton, VIC, Australia

28 **Email addresses:** JZ, [jinxin.zhao@monash.edu](mailto:jinxin.zhao@monash.edu); JH, [han.ji@wehi.edu.au](mailto:han.ji@wehi.edu.au); YL, [yu-](mailto:yu-wei.lin@monash.edu)  
29 [wei.lin@monash.edu](mailto:wei.lin@monash.edu); YZ, [Yan.Zhu@monash.edu](mailto:Yan.Zhu@monash.edu); MA, [konstanz.de](mailto:michael.aichem@uni-</a><br/>30 <a href=); DG, [dimitar.garkov@uni-konstanz.de](mailto:dimitar.garkov@uni-konstanz.de); PB, [phillip.bergen@monash.edu](mailto:phillip.bergen@monash.edu);  
31 SN, [sue.nang@monash.edu](mailto:sue.nang@monash.edu); JY, [jzye89@163.com](mailto:jzye89@163.com); TZ, [wytli@163.com](mailto:wytli@163.com); TV,  
32 [tony.velkov@monash.edu](mailto:tony.velkov@monash.edu); JS, [jiangning.song@monash.edu](mailto:jiangning.song@monash.edu); FS, [konstanz.de](mailto:falk.schreiber@uni-</a><br/>33 <a href=); JL, [jian.li@monash.edu](mailto:jian.li@monash.edu).

34 **Running title:** PhageGE for bacteriophage genomic analysis

35 \*Corresponding authors:

36 Dr Jinxin Zhao, Tel: +61 3 99056288, Email: [jinxin.zhao@monash.edu](mailto:jinxin.zhao@monash.edu);

37 Professor Jian Li, Tel: +61 3 99039172 Fax: +61 0399056450; Email:  
38 [jian.li@monash.edu](mailto:jian.li@monash.edu).

39

40

41 **Abstract**

42 **Background:** Antimicrobial resistance is a serious threat to global health. Due to the  
43 stagnant antibiotic discovery pipeline, bacteriophages (phages) have been proposed  
44 as an alternative therapy for the treatment of infections caused by multidrug-resistant  
45 (MDR) pathogens. Genomic features play an important role in phage pharmacology.  
46 However, our knowledge of phage genomics is sparse and the use of existing  
47 bioinformatic pipelines and tools requires considerable bioinformatic expertise. These  
48 challenges have substantially limited the clinical translation of phage therapy.

49 **Findings:** We have developed PhageGE (Phage Genome Explorer), a user-friendly  
50 graphical interface application for the interactive analysis of phage genomes.  
51 PhageGE enables users to perform key analyses, including phylogenetic analysis,  
52 visualisation of phylogenetic trees, prediction of phage lifecycle, and comparative  
53 analysis of phage genome annotations. The new R Shiny webserver, PhageGE,  
54 integrates existing R packages and combines them with several newly developed  
55 functions to facilitate these analyses. Additionally, the webserver provides interactive  
56 visualisation capabilities and allows users to directly export publication-quality images.

57 **Conclusions:** PhageGE is a valuable tool that simplifies the analysis of phage  
58 genome data and may expedite the development and clinical translation of phage  
59 therapy. PhageGE is publicly available at <http://www.phagege.com/>.

60 **Keywords:** Phage genome, biological web application, genomic analysis, phylogeny,  
61 lifestyle

62

## 63 **Introduction**

64 The rapid emergence and spread of antimicrobial resistance (AMR) is one of the three  
65 greatest threats to human health globally [1]. It is estimated that by 2050, life-  
66 threatening infections caused by antimicrobial-resistant pathogens will kill more  
67 people than any other diseases [2]. Of particular concern is the increased prevalence  
68 of infections caused by Gram-negative pathogens, which are more difficult to treat  
69 than Gram-positive pathogens [3]. Given the sluggish global antibiotic pipeline [4],  
70 bacteriophages (phages) have attracted significant attention over the last decade as  
71 a potential alternative therapy for bacterial infections [5]. Phages are bacterial viruses  
72 and the advantages of phage therapy over antibiotics include a narrow spectrum of  
73 activity, the capacity to multiply at the infection site, and safety [6-8]. Optimising phage  
74 therapy in patients requires key pharmacological information, including infection cycle,  
75 gene content, and phage taxonomy [9, 10]. For example, temperate phages do not  
76 immediately lyse bacterial host cells and have an inherent capacity to mediate the  
77 transfer of genes between bacteria, potentially facilitating increased bacterial virulence  
78 and AMR. In contrast, lytic phages kill bacteria upon infection and are commonly used  
79 for the treatment of MDR bacterial infections in patients [11-14].

80 Multi-omics has the potential to expedite the clinical translation of phage therapy for  
81 the treatment of MDR bacterial infections [15]. For example, whole genome-based  
82 phylogenetic analysis offers significant advantages in understanding phage  
83 evolutionary dynamics and designing potential phage cocktails [16, 17]. Furthermore,  
84 combining whole-genome sequencing (WGS) with *in silico* prediction enables rapid  
85 prediction of phage lifestyle [18]. Several popular bioinformatic pipelines and tools are  
86 available for multiple sequence alignment (MAFFT) [19], phylogenetic reconstruction  
87 (RAxML and IQ-TREE) [20, 21], visualisation of phylogeny (ggtree) [22], and phage

88 lifestyle prediction (PHACTS and BACPHLIP) [18, 23]; however, utilising these tools  
89 requires proficient programming skills. Therefore, a user-friendly platform for phage  
90 genomic analyses is urgently needed to overcome the challenges associated with the  
91 requirement for advanced programming expertise.

92 Here, we developed an integrated webserver platform, PhageGE, that offers four key  
93 functionalities: phage phylogenetic analysis, tree visualisation, lifestyle prediction, and  
94 manipulation of phage genome annotation datasets. PhageGE differs from existing  
95 phage genomic analysis tools in that it facilitates the seamless export of all associated  
96 results in a publication-ready format without requiring complex procedures or long  
97 running times. Overall, PhageGE provides a user-friendly interface to streamline  
98 phage genomic analysis with WGS data.

99

## 100 **Results**

101 The PhageGE webserver (biotoolsID: biotools:phagege and RRID: SCR\_025380) was  
102 designed to ensure user-friendliness and compatibility with major web browsers,  
103 including Google Chrome, Mozilla Firefox, Apple Safari, and Microsoft Edge (**Table 1**).

### 104 **Webserver submission and case studies**

105 To demonstrate the functions and the scope of application of PhageGE, we herein  
106 describe the results of a case study using PhageGE, including phage whole genome  
107 data (i.e., .fasta), a phylogenetic tree file (i.e., .tre), and genome annotation data  
108 (i.e., .xls, .txt and .gff), which are collectively referred to as “Example Data” (**Figure**  
109 **1**). The complete set of Example Data used in the case studies can be accessed on  
110 the PhageGE GitHub repository (<https://github.com/JinxinMonash/PhageGE>).



## 111 **Phage phylogenetic analysis and visualisation**

112 To illustrate the phylogenetic analysis function in PhageGE and its application in  
113 clinical translation, we analysed our GitHub example dataset, which consists of 15  
114 phage genomes. The hosts of the 15 phage genomes in the phylogenetic analysis are  
115 from 3 different bacterial species: *Citrobacter freundii*, *Escherichia coli*, and *Klebsiella*  
116 *pneumoniae* (**Figure 2A**). This dataset includes one anti-Klebsiella phage, pKp20,  
117 which was isolated in our lab and used in a clinical case [24]. In that case, a recurrent  
118 urinary tract infection [rUTI] was successfully treated with 4 weeks of adjunctive  
119 intravenous bacteriophage therapy, with no recurrence during a year of follow-up [24].  
120 Both taxonomy information from phylogeny analysis and the lifestyle prediction played  
121 key roles in the selection of pKp20 over a wide range of phages [24]. The phage WGS  
122 data in the fasta format can be obtained either from NCBI or prepared locally using  
123 standard genome assembly pipelines (e.g., SPAdes) based on the previous BLASTn  
124 result [24]. To compare the results obtained from PhageGE with the multiple sequence  
125 alignment-based approach, we also conducted a multiple sequence alignment-based  
126 phylogenetic analysis using MAFFT v7.47 and fasttree v2.1.10, alongside the  
127 phylogenetic analysis using PhageGE. We firstly uploaded the selected fasta files or  
128 a multi-fasta file which contains all phage genomes on the Phylogenetic Analysis page  
129 in PhageGE, then selected the layout of the tree (i.e., phylogram, cladogram, fan,  
130 radial, or tidy) and clicked the “Explore Tree” icon. The resulting phylogenetic tree,  
131 representing the relationships among the uploaded genomes, was generated using  
132 the built-in *k*-mer-based alignment-free phylogenetic approach, as detailed in the  
133 Methods section (**Figures 2A and 3A**). To enhance the clarity, we manually  
134 highlighted the 15 phages with distinct colours according to their genus. Comparison  
135 of the phylogenetic trees generated by PhageGE and MAFFT revealed that both trees

136 shared largely the same classification (e.g., positions of each phage and the related  
137 taxa) (**Figure 3**). Moreover, PhageGE demonstrates a significant improvement in  
138 runtime efficiency. For example, on a 2-GHz CPU with 64 GB RAM server, the  
139 runtimes of generating phylogenetics trees by PhageGE were 0.22 minutes for 15  
140 phage genomes and 4.42 minutes for 146 phage genomes. In contrast, the MSA-  
141 based approach (using tools like MAFFT along with FastTree) took 30 minutes and  
142 296 minutes, respectively. This demonstrates that the performance of the phylogenetic  
143 analysis of PhageGE is accurate, fast and comparable to the multiple sequence  
144 alignment-based approach.

145 The phylogenetic visualisation function handles the phylogenetic tree along with  
146 diverse accompanying data. Its aim is to provide an interactive visualisation platform  
147 that enhances the accessibility of phylogenetic data and facilitates the phylogenetic  
148 analysis of phage comparative genomics studies. The phylogenetic tree and  
149 associated data can be extracted using a built-in function within PhageGE. This  
150 function is illustrated using a tree file “phage.tre” obtained from phage phylogenetic  
151 analysis (whether generated by PhageGE or other phylogenetic analysis pipeline) and  
152 a sample information file named “sample\_info.csv” containing the taxonomy  
153 information for all 14 phages (**Figure 2B**). As shown in **Figure 4**, each dot in the  
154 dendrogram represents one phage with the colour indicating its taxonomic  
155 classification in the same genus. In addition, detailed information of each phage (e.g.,  
156 name and taxonomy) can be easily accessed by hovering the cursor over the dot of  
157 interest (as indicated by the pink box in **Figure 4**). This interactive feature allows users  
158 to dynamically integrate and visualise the underlying information in a user-friendly  
159 manner.

## 160 **Performance of phage lifestyle prediction**

161 The lifestyle prediction function builds on a Random Forest classifier that incorporates  
162 up-to-date conserved protein domains with the ability to classify temperate and lytic  
163 phages using WGS data. To evaluate its performance, we compared the function with  
164 other published tools using the dataset of 1,057 phages in the literature [25]. The  
165 PhageGE lifestyle prediction function achieved the lowest error rates (0%, 1.2%, 0.3%  
166 and 2.5%, equivalent to 100%, 98.8%, 99.7% and 97.5% classification accuracy,  
167 respectively) across all tested datasets, substantially outperforming those existing  
168 tools for phage lifestyle classification (**Figure 5**). The prediction accuracy of PhageGE  
169 exceeded that of the most accurate existing tool, BACPHLIP, which had prediction  
170 accuracies of 99.8%, 98.3%, 99.2% and 96.5%, respectively (**Figure 5**). Similarly,  
171 WGS data for individual phages (e.g., *Klebsiella* phage KP36.fasta, vB8388.fasta, and  
172 FK1979.fasta from the example dataset described here) can be uploaded as input to  
173 generate the phage lifestyle probability table (**Figure 2C** and **Table 2**). The result  
174 presented in **Table 2** predicts that *Klebsiella* phages KP36 (a model phage in our  
175 laboratory), FK1979, and vB8388 [26] (two phages isolated from hospital sewage, The  
176 First Affiliated Hospital of Wenzhou Medical University, China), and pKp20 (used in  
177 the rUTI clinical case study) [24], are highly likely lytic phages, with the probability of  
178 99.3%, 95.6% and 96.9%, respectively. Meanwhile, the four phages from the NCBI in  
179 **Table 2** NC\_017985, NC\_027339, NC\_009815, and NC\_019768 are highly likely  
180 temperate phages. This function empowers users to rapidly analyse the lifestyle of a  
181 phage of interest *in silico* with high prediction accuracy, providing key insights into the  
182 intricate phage ecosystems and enabling optimal design of phage therapy.

### 183 **Comparison of phage genome annotation**

184 Notably, PhageGE also provides a function to compare phage genome annotations  
185 obtained from different pipelines (i.e., Pharokka, Phaster and RAST). This analysis

186 involves the integration of R package flextable, which allows for the generation of  
187 downloadable comparison results in multiple formats (e.g., csv, Excel and PDF). The  
188 user interface offers the flexibility to rank the results based on multiple parameters  
189 (e.g., location and/or length of the coding sequence [CDS]). In the case study  
190 presented here, we used PhageGE to compare genome annotations of *Klebsiella*  
191 phages KP36, vB8838, and FK1979 generated from Phaster, RAST, and Pharokka  
192 (**Figure 2D**). By selecting “common\_annotation”, a table with 75, 45, and 51 genes  
193 that were annotated in all three pipelines was generated for KP36, vB8838, and  
194 FK1979, respectively. We also identified 17, 7, and 12 unique genes from the  
195 Pharokka pipeline by selecting the “Pharokka\_only” option. To gain a better  
196 understanding of those unique annotated genes, PhageGE allows users to directly  
197 copy and download both the nucleotide and amino acid sequences associated with  
198 the genes from the interactive table. This feature facilitates further investigation of  
199 these unique annotations.

200

## 201 **Discussion**

202 With the dramatic rise in MDR bacterial infections, phage therapy has emerged as a  
203 safe and potentially effective alternative treatment option to antibiotics [27]. However,  
204 the development of effective phage therapies is complex, involving the isolation,  
205 culturing, characterisation, and timely preparation of efficacious phages. Traditionally,  
206 this process is time-consuming and costly [28, 29]. Nevertheless, with the next-  
207 generation sequencing techniques, it has become possible to rapidly and cost-  
208 effectively characterise phages. Despite this advancement, there is a paucity of  
209 intuitive tools available for phage genomics, with the majority requiring operation in

210 command-line mode. The availability of large phage genomic datasets presents  
211 unique opportunities to develop bioinformatics tools that aid in phage biology and  
212 pharmacology research. The use of computational methods to study phages has  
213 shown promise in generating novel insights, such as phylogeny and lifestyle, through  
214 bioinformatic analysis [18, 25, 30]. However, there is currently no single tool available  
215 that encompasses all those functions (e.g., phylogenetic analysis, tree visualisation,  
216 lifestyle prediction, and genome annotation comparison) in the webserver platform.  
217 Herein, we describe the development of the PhageGE webserver GUI streamlined for  
218 user-friendly phage genomic analysis.

219 PhageGE is a novel, user-friendly GUI application for the interactive analysis of phage  
220 genomes. The overarching goal of PhageGE is to provide an interactive analysis and  
221 visualisation platform for the rapid exploration of phage genomic associations, thereby  
222 promoting efficient genomic data-driven discovery of phage therapy. PhageGE  
223 comprises a set of functions for phage genomic analysis, including phylogenetic  
224 analysis, tree visualisation, lifestyle prediction, and genome annotation comparison.  
225 While current tools like PhaGAA can provide lifestyle reorganisation analysis, their  
226 primary utility lies in analysing phage lifestyle for their preferred phage dataset (e.g.,  
227 gut flora of human neonates) [31]. In contrast, PhageGE integrates a more  
228 comprehensive dataset with a wide range of phage genomes, allowing for broader and  
229 deeper exploration of phage lifestyles. Moreover, the comparison of annotations from  
230 different pipelines highlights the key role of PhageGE in advancing phage genomics  
231 through enhanced analysis and visualisation functions. To exemplify the utility of  
232 PhageGE, we investigated the phylogeny, lifestyle, and annotation comparison of  
233 *Klebsiella* phages KP36, vB8838, and FK1979, which were independently isolated in  
234 two different countries. Our findings demonstrate that the various functions of

235 PhageGE yield comparable or better results than existing state-of-the-art approaches.  
236 These results highlight the significant potential of PhageGE in analysing various phage  
237 genomic features using phage WGS data.

238 Notably, PhageGE requires only phage WGS data as the input for conducting the  
239 related analysis. The phage phylogenetic analysis function takes phage WGS in the  
240 fasta format as input and applies an alignment-free phylogenetic approach to infer  
241 phylogenetic relationships. Compared to current phylogenetic analysis pipelines (i.e.,  
242 multiple sequence alignment-based phylogenetic analysis), analysis from PhageGE  
243 showed similar phage phylogeny information in a shorter computing time  
244 (approximately 13 seconds versus 30 minutes for 15 phage genomes). Moreover, the  
245 result from phylogenetic analysis can be easily exported in various graphical formats  
246 (e.g., SVG, PDF and JPEG) and textual formats (e.g., Newick and Nexus) and can  
247 be interactively managed and viewed through our designed user interface. In addition,  
248 PhageGE introduces an enhanced phage lifestyle prediction function, using a  
249 machine-learning approach with updated databases for conserved protein domains.  
250 The overall approaches applied for both phylogenetic analysis and lifestyle prediction  
251 demonstrate that analyses results from PhageGE are comparable to previously  
252 published tools (**Figures 3 and 5**), showing its effectiveness in accurately analysing  
253 phage phylogeny and predicting phage lifestyle. Notably, PhageGE incorporates a  
254 function of annotation comparison to facilitate the efficient organisation of genome  
255 annotation files derived from different annotation pipelines. This feature allows users  
256 to efficiently compare genome annotation data obtained with different tools. Overall,  
257 all four functions from PhageGE serve as a guide for the exploration of phage  
258 genomic features and will expedite the clinical translation of phage therapy.

259

## 260 **Conclusion**

261 In conclusion, PhageGE is the first user-friendly tool for the analysis of phage  
262 genomes, offering improved functions compared to existing tools without the need for  
263 considerable programming skills. Uniquely incorporating features like phylogenetic  
264 analysis, interactive tree visualisation, lifestyle prediction, and genome annotation  
265 comparison, we anticipate that PhageGE will become an instrumental bioinformatic  
266 web server for phage genomic analysis, guiding experimental validations and  
267 advancing the development of phage therapy.

268

## 269 **Methods**

### 270 **Implementation**

271 PhageGE 1.0 was developed in R and is hosted on Shinyapps. This application  
272 seamlessly integrates various R packages, including Rshiny, seqinr, Biostrings, ape,  
273 textmineR, tidyverse, ggtree, ploty, ggplot, reticulate, and pyhmmer [22, 32-38].  
274 Furthermore, it incorporates several key functions, including *k*-mer-based phylogeny  
275 estimation, phylogenetic tree visualisation, lifestyle prediction, and annotation  
276 comparison. To use PhageGE, input files in the standard WGS fasta format are  
277 required, along with textual tables in standard formats (e.g., csv or xlsx) containing  
278 sequence details and annotation information. The workflow is illustrated in **Figure 1**.

### 279 **Phage genomic analysis pipeline**

280 The functionalities offered in the web interface of PhageGE utilise WGS fasta files for  
281 phylogenetic analysis and lifestyle prediction. Users can input tree files (e.g., Newick  
282 or Nexus) and textual files (i.e., csv or xlsx) for phylogenetic tree visualisation and

283 genome annotation comparisons. Using these standard formats as input files  
284 facilitates effective use and simplifies data export for users.

### 285 **Phylogenetic analysis and phylogenetic tree visualisation**

286 The phylogenetic analysis function enables fast and efficient analysis of phage  
287 phylogeny. It includes phylogeny reconstruction based on the input WGS data and  
288 visualisation of phylogenetic information. This function incorporates a  $k$ -mer-based  
289 alignment-free phylogenetic approach [39]. Alignment-free phylogenetic approaches  
290 offer a scalable alternative for inferring phylogenetic relationships and computing local  
291 alignment boundaries from WGS data [40, 41]. This approach is particularly robust for  
292 genome sequences that exhibit genetic recombinations and rearrangements. It has  
293 demonstrated the ability to accurately reconstruct biologically relevant phylogenies  
294 with thousands of microbial genomes [42-44]. The description of this function is briefly  
295 outlined below.

296 Consider a sequence consisting of four characters (A, T, C, G) of length  $k$  (' $k$ -mer'),  
297 described by **Equation 1**. There are  $4^k$  possible  $k$ -mers (**Equation 2**), which can serve  
298 as features of each genome. The value assigned to a specific  $k$ -mer feature will  
299 correspond to the number of occurrences of that  $k$ -mer in the genome. Using these  
300  $k$ -mer features, a data matrix is generated with dimensions of the numbers of genomes  
301 of interest ( $n$  columns) by  $4^k$  rows. To establish a representative probability distribution  
302 of the  $4^k$   $k$ -mers, each row of the data matrix is normalised by its row total. This  
303 normalisation results in a feature-frequency profile ( $F_k$ , described by **Equation 3**) for  
304 each  $k$ -mers sequence [39]. The Jensen-Shannon divergence ( $D_k$ , described by  
305 **Equation 4**) is then employed to estimate the genome pairwise distances [45].  
306 Subsequently, the resulting distance matrix is used as an input for a clustering



307 algorithm (e.g., neighbor-joining algorithm) to summarise the relatedness of the phage  
308 genomes and construct a phylogenetic tree [35].

309 **Equation 1:**  $C_k = \langle C_{k,1}, C_{k,2} \dots C_{k,m} \rangle$

310 **Equation 2:**  $m = 4^k$

311 **Equation 3:**  $F_{n_i,k} = \frac{C_{n_i,k,m}}{\sum_{n_i} C_{n_i,k}}$

312 **Equation 4:**  $D_k = JS(F_{n_1,k}, F_{n_i,k})$

313

314 An interactive visualisation of a phylogenetic tree was generated either from the  
315 phylogenetic analysis function or a customised phylogenetic tree that includes  
316 additional information, such as species classification, duplication events, and  
317 bootstrap values. It is implemented using ggtree and ploty R packages [22], ensuring  
318 the ability to handle most common tree formats (e.g., Newick, Nexus, and tre).

### 319 **Lifestyle prediction**

320 The Lifestyle Prediction function in PhageGE generates a phage lifestyle probability  
321 table based on the input of phage WGS data. This function adapted previously  
322 reported approaches into our user-friendly interface [18, 23, 25]. By employing an  
323 improved search function (i.e. searching a sequence file against the build-in Hidden  
324 Markov Model [HMM] database), PhageGE provides an efficient way to predict phage  
325 lifestyle based on the phage genomic information.

326 In brief, we first conducted a search in the Conserved Domain Database (accessed:  
327 11/2023) to collect protein domains from temperate phages [46]. The following key

328 words were used to identify relevant protein domains: ‘temperate’, ‘lysogen’,  
329 ‘integrase’, ‘excisionase’, ‘recombinase’, ‘transposase’, ‘parA|parB’, and ‘xerC|xerD’.  
330 We obtained a total of 477 protein domains from the initial collection, which were then  
331 subjected to a careful manual curation and filtration (e.g., minimal domain length >30  
332 and validated in the existing experimental data), resulting in a refined set of 261 protein  
333 domains. Next, a lifestyle classification model was trained and tested using a  
334 published dataset consisting of 1,057 phages from 6 different families (*Inoviridae*,  
335 *Myoviridae*, *Plasmaviridae*, *Podoviridae*, *Siphoviridae*, and *Tectiviridae*) across 55  
336 host genera, with known genome and lifestyle information [25]. The dataset was  
337 randomly split into training and testing sets, with a ratio of 60:40 (634 phages in the  
338 training set and 423 phages in the testing set). At this stage, the testing set was fully  
339 set aside for subsequent descriptions related to model training and development. For  
340 each genome sequence in the training set, we generated a list of all possible 6-frame  
341 translation sequences that were at least 40 amino acids long. HMMER3 was then used  
342 to search for the presence or absence of the various protein domains listed above,  
343 resulting in a vector for each phage describing the presence (1) or absence (0) of each  
344 domain [47]. This information allowed us to filter the initial set of 477 putatively useful  
345 protein domains down to the final set of 261. Subsequently, a Random Forest classifier  
346 was fitted to the training set of phage genomes, and cross-validation was employed to  
347 fine-tune the model hyper-parameters. The ‘best’ performing model was then selected  
348 by choosing the hyper-parameters that yielded the highest minimum accuracy across  
349 the independent validation set tests. The parameters of that model were then re-fitted  
350 to the entire training set data, resulting in the final model.

### 351 **Annotation comparison**

352 The Rapid Annotation using Subsystem Technology (RAST) server was developed in  
353 2008 to annotate microbial genomes based on the manually curated SEED database  
354 [48]. The PHAge Search Tool – Enhanced Release (PHASTER) was specifically  
355 designed to identify and annotate prophage sequences within bacteria using  
356 prophage/virus databases [49]. More recently, another phage annotation tool,  
357 Pharokka, has been developed using PHROGS, CARD, and VFDB databases [50].  
358 Since these pipelines employ different databases for phage genome annotation, it is  
359 possible to obtain different annotations from each pipeline. To provide more  
360 comprehensive annotation results, there is an urgent need for annotation comparison  
361 tables that incorporate all annotation information from RAST, PHASTER, and  
362 Pharokka. The Annotation Comparison function in PhageGE generates interactive  
363 tables that display comments and differing genome annotation information obtained  
364 from RAST, PHASTER, and Pharokka. This comparison includes checking the coding  
365 regions and related annotations from each pipeline. Moreover, it provides an overview  
366 of common and different annotation counts, facilitating the tracking of differences  
367 between the three pipelines. This function is implemented using the flextable,  
368 tidyselect, data.table, and tidyverse packages [37].

369

## 370 **Code availability and requirements**

- 371 • Project name: PhageGE (Phage Genome Exploration)
- 372 • Project homepage: <https://github.com/JinxinMonash/PhageGE>
- 373 • Operating system(s): Linux, Windows and MacOS (**Table 1**)
- 374 • Programming language: R
- 375 • License: MIT license

## 376 **Data availability**

377 In general, all data used in this work were from openly accessible public repositories  
378 and released with other publications under open-source licenses. The data used were  
379 solely for research purposes, and we confirm that they were not used for any other  
380 noncommercial or commercial purpose. The datasets supporting the results of this  
381 article are available in the Github repository,  
382 [\[https://github.com/JinxinMonash/PhageGE\]](https://github.com/JinxinMonash/PhageGE). The data used as examples can be  
383 found in the release branch called “Example data” or “Example data.zip” within our  
384 repository. The GitHub repository also contains up-to-date tutorials.

385

## 386 **Competing interests**

387 The authors declare that they have no competing interests.

388

## 389 **Funding**

390 This work was supported by the National Institute of Allergy and Infectious Diseases  
391 of the National Institutes of Health [grant number R21 AI156766 to J.L.]. The content  
392 is solely the responsibility of the authors and does not necessarily represent the official  
393 views of the National Institute of Allergy and Infectious Diseases or the National  
394 Institutes of Health.

395

## 396 **Author's contributions**

397 J.Z. collected all the data and participated in developing the webserver and writing the  
398 manuscript. J.H., Y.W.L., Y.Z., M.A. and D.G. and J.N.S. contributed to the

399 development of the web server. P.J.B., S.N., J.Z.Y., T.L.Z. and T.V. took part in the  
400 discussion of the data. J.Z., F.S. and J.L. conceived the study, coordinated the work  
401 and contributed to writing the manuscript. All authors are involved in the discussion  
402 and finalisation of the manuscript.

403

#### 404 **Acknowledgements**

405 J.Z. is a recipient of the 2022 Faculty of Medicine, Nursing and Health Sciences  
406 Bridging Fellowship, Monash University. J.L. is an Australian National Health Medical  
407 Research Council (NHMRC) Investigator Research Fellow and T.V. is an Australian  
408 Research Council (ARC) Industrial Fellow. Y.W.L. is currently an employee of Certara,  
409 Australia and Co-Director of the Malaya Translational and Clinical Pharmacometrics  
410 Group, University of Malaya, Malaysia.

411

412 **References**

- 413 1. Murray CJ, Ikuta KS, Sharara F, Swetschinski L, Aguilar GR, Gray A, et al.  
414 Global burden of bacterial antimicrobial resistance in 2019: a systematic  
415 analysis. *The Lancet*. 2022;399 10325:629-55.
- 416 2. Luepke KH, Suda KJ, Boucher H, Russo RL, Bonney MW, Hunt TD, et al. Past,  
417 present, and future of antibacterial economics: increasing bacterial resistance,  
418 limited antibiotic pipeline, and societal implications. *Pharmacotherapy: The*  
419 *Journal of Human Pharmacology and Drug Therapy*. 2017;37 1:71-84.
- 420 3. Bassetti M and Garau J. Current and future perspectives in the treatment of  
421 multidrug-resistant Gram-negative infections. *Journal of Antimicrobial*  
422 *Chemotherapy*. 2021;76 (Suppl 4):iv23-iv37.
- 423 4. Böttcher L, Gersbach H and Wernli D. Restoring the antibiotic R&D market to  
424 combat the resistance crisis. *Science and Public Policy*. 2022;49 1:127-31.
- 425 5. Uyttebroek S, Chen B, Onsea J, Ruythooren F, Debaveye Y, Devolder D, et al.  
426 Safety and efficacy of phage therapy in difficult-to-treat infections: a systematic  
427 review. *The Lancet Infectious Diseases*. 2022; 22 8:E208-E220.
- 428 6. Kortright KE, Chan BK, Koff JL and Turner PE. Phage therapy: a renewed  
429 approach to combat antibiotic-resistant bacteria. *Cell Host & Microbe*. 2019;25  
430 2:219-32.
- 431 7. Mousavi SM, Babakhani S, Moradi L, Karami S, Shahbandeh M, Mirshekar M,  
432 et al. Bacteriophage as a novel therapeutic weapon for killing colistin-resistant  
433 multi-drug-resistant and extensively drug-resistant gram-negative bacteria.  
434 *Current Microbiology*. 2021;78 12:4023-36.
- 435 8. Lin Y, Chang RY, Rao G, Jermain B, Han M-L, Zhao J, et al.  
436 Pharmacokinetics/pharmacodynamics of antipseudomonal bacteriophage

- 437 therapy in rats: a proof-of-concept study. *Clinical Microbiology and Infection*.  
438 2020;26 9:1229-35.
- 439 9. Hyman P. Phages for phage therapy: isolation, characterization, and host range  
440 breadth. *Pharmaceuticals*. 2019;12 1:35.
- 441 10. Gordillo Altamirano FL and Barr JJ. Phage therapy in the postantibiotic era.  
442 *Clinical Microbiology Reviews*. 2019;32 2:e00066-18.
- 443 11. Roach DR, Leung CY, Henry M, Morello E, Singh D, Di Santo JP, et al. Synergy  
444 between the host immune system and bacteriophage is essential for successful  
445 phage therapy against an acute respiratory pathogen. *Cell Host & Microbe*.  
446 2017;22 1:38-47. e4.
- 447 12. Harrison E and Brockhurst MA. Ecological and evolutionary benefits of  
448 temperate phage: what does or doesn't kill you makes you stronger. *BioEssays*.  
449 2017;39 12:1700112.
- 450 13. Gill JJ and Hyman P. Phage choice, isolation, and preparation for phage  
451 therapy. *Current Pharmaceutical Biotechnology*. 2010;11 1:2-14.
- 452 14. Abedon ST, García P, Mullany P and Aminov R. Phage therapy: past, present  
453 and future. *Frontiers Media SA*, 2017, p. 981.
- 454 15. Debnath M, Prasad GB and Bisen PS. Omics technology. *Molecular*  
455 *Diagnostics: Promises and Possibilities*. Springer; 2010. p. 11-31.
- 456 16. Parmar KM, Dafale NA, Tikariha H and Purohit HJ. Genomic characterization  
457 of key bacteriophages to formulate the potential biocontrol agent to combat  
458 enteric pathogenic bacteria. *Archives of Microbiology*. 2018;200 4:611-22.
- 459 17. Philipson CW, Voegtly LJ, Lueder MR, Long KA, Rice GK, Frey KG, et al.  
460 Characterizing phage genomes for therapeutic applications. *Viruses*. 2018;10  
461 4:188.

- 462 18. McNair K, Bailey BA and Edwards RA. PHACTS, a computational approach to  
463 classifying the lifestyle of phages. *Bioinformatics*. 2012;28 5:614-8.
- 464 19. Katoh K and Standley DM. MAFFT multiple sequence alignment software  
465 version 7: improvements in performance and usability. *Molecular Biology and*  
466 *Evolution*. 2013;30 4:772-80.
- 467 20. Stamatakis A. RAxML version 8: a tool for phylogenetic analysis and post-  
468 analysis of large phylogenies. *Bioinformatics*. 2014;30 9:1312-3.
- 469 21. Minh BQ, Schmidt HA, Chernomor O, Schrempf D, Woodhams MD, Von  
470 Haeseler A, et al. IQ-TREE 2: new models and efficient methods for  
471 phylogenetic inference in the genomic era. *Molecular Biology and Evolution*.  
472 2020;37 5:1530-4.
- 473 22. Xu S, Li L, Luo X, Chen M, Tang W, Zhan L, et al. Ggtree: A serialized data  
474 object for visualization of a phylogenetic tree and annotation data. *iMeta*.  
475 2022;3 1:e56.
- 476 23. Hockenberry AJ and Wilke CO. BACPHLIP: predicting bacteriophage lifestyle  
477 from conserved protein domains. *PeerJ*. 2021;9:e11396.
- 478 24. Le T, Nang SC, Zhao J, Yu HH, Li J, Gill JJ, et al. Therapeutic potential of  
479 intravenous phage as standalone therapy for recurrent drug-resistant urinary  
480 tract infections. *Antimicrobial Agents and Chemotherapy*. 2023;67 4:e00037-  
481 23.
- 482 25. Mavrigh TN and Hatfull GF. Bacteriophage evolution differs by host, lifestyle  
483 and genome. *Nature Microbiology*. 2017;2 9:1-9.
- 484 26. Zhao Y, Feng L, Zhou B, Zhang X, Yao Z, Wang L, et al. A newly isolated  
485 bacteriophage vB8388 and its synergistic effect with aminoglycosides against



- 486 multi-drug resistant *Klebsiella oxytoca* strain FK-8388. *Microbial Pathogenesis*.  
487 2023;174:105906.
- 488 27. Khan A, Rao TS and Joshi HM. Phage therapy in the Covid-19 era: Advantages  
489 over antibiotics. *Current Research in Microbial Sciences*. 2022;3:100115.
- 490 28. Camarillo-Guerrero LF, Almeida A, Rangel-Pineros G, Finn RD and Lawley TD.  
491 Massive expansion of human gut bacteriophage diversity. *Cell*. 2021;184  
492 4:1098-109.
- 493 29. Carrigy NB, Larsen SE, Reese V, Pecor T, Harrison M, Kuehl PJ, et al.  
494 Prophylaxis of *Mycobacterium tuberculosis* H37Rv infection in a preclinical  
495 mouse model via inhalation of nebulized bacteriophage D29. *Antimicrobial  
496 Agents and Chemotherapy*. 2019;63 12:e00871-19.
- 497 30. Martinez-Vaz BM and Mickelson MM. In silico phage hunting: bioinformatics  
498 exercises to identify and explore bacteriophage genomes. *Frontiers in  
499 Microbiology*. 2020;11:577634.
- 500 31. Wu J, Liu Q, Li M, Xu J, Wang C, Zhang J, et al. PhaGAA: an integrated web  
501 server platform for phage genome annotation and analysis. *Bioinformatics*.  
502 2023;39 3:btad120.
- 503 32. Sievert C. Interactive web-based data visualization with R, plotly, and shiny.  
504 *Journal of the Royal Statistical Society Series A: Statistics in Society*.  
505 2020;184:1150.
- 506 33. Charif D and Lobry JR. SeqinR 1.0-2: a contributed package to the R project  
507 for statistical computing devoted to biological sequences retrieval and analysis.  
508 *Structural approaches to sequence evolution*. Springer; 2007. p. 207-32.

- 509 34. Pagès H, Aboyoun P, Gentleman R, DebRoy S. Biostrings: Efficient  
510 manipulation of biological strings. 2024. Biostrings (Version 2.70.2)  
511 <https://bioconductor.org/packages/Biostrings>.
- 512 35. Paradis E and Schliep K. ape 5.0: an environment for modern phylogenetics  
513 and evolutionary analyses in R. *Bioinformatics*. 2019;35 3:526-8.
- 514 36. Jones T, Doane W and Jones MT. Package 'textmineR'. Functions for text  
515 mining and topic modeling. 2021. textmineR (Version 3.0.5)  
516 <https://github.com/TommyJones/textmineR>.
- 517 37. Wickham H and Wickham MH. Welcome to the tidyverse. *Journal of Open*  
518 *Source Software*. 2019. 4(43), 1686.
- 519 38. Wickham H and Wickham MH. *ggplot2: Elegant Graphics for Data Analysis*.  
520 Springer-Verlag New York . 2016. <https://ggplot2.tidyverse.org/>
- 521 39. Sims GE, Jun S-R, Wu GA and Kim S-H. Alignment-free genome comparison  
522 with feature frequency profiles (FFP) and optimal resolutions. *Proceedings of*  
523 *the National Academy of Sciences*. 2009;106 8:2677-82.
- 524 40. Mapleson D, Garcia Accinelli G, Kettleborough G, Wright J and Clavijo BJ. KAT:  
525 a K-mer analysis toolkit to quality control NGS datasets and genome  
526 assemblies. *Bioinformatics*. 2017;33 4:574-6.
- 527 41. Jain C, Koren S, Dilthey A, Phillippy AM and Aluru S. A fast adaptive algorithm  
528 for computing whole-genome homology maps. *Bioinformatics*. 2018;34  
529 17:i748-i56.
- 530 42. Bernard G, Chan CX and Ragan MA. Alignment-free microbial phylogenomics  
531 under scenarios of sequence divergence, genome rearrangement and lateral  
532 genetic transfer. *Scientific Reports*. 2016;6 1:1-12.

- 533 43. Jacobus AP, Stephens TG, Youssef P, González-Pech R, Ciccotosto-Camp  
534 MM, Dougan KE, et al. Comparative genomics supports that Brazilian  
535 bioethanol *Saccharomyces cerevisiae* comprise a unified group of  
536 domesticated strains related to cachaça spirit yeasts. *Frontiers in Microbiology*.  
537 2021;12:644089.
- 538 44. Bernard G, Greenfield P, Ragan MA and Chan CX. k-mer similarity, networks  
539 of microbial genomes, and taxonomic rank. *Msystems*. 2018;3 6:e00257-18.
- 540 45. Sims GE and Kim S-H. Whole-genome phylogeny of *Escherichia coli*/*Shigella*  
541 group by feature frequency profiles (FFPs). *Proceedings of the National*  
542 *Academy of Sciences*. 2011;108 20:8329-34.
- 543 46. Lu S, Wang J, Chitsaz F, Derbyshire MK, Geer RC, Gonzales NR, et al.  
544 CDD/SPARCLE: the conserved domain database in 2020. *Nucleic Acids*  
545 *Research*. 2020;48 D1:D265-D8.
- 546 47. Eddy SR. Profile hidden Markov models. *Bioinformatics*. 1998;14 9:755-63.
- 547 48. Overbeek R, Olson R, Pusch GD, Olsen GJ, Davis JJ, Disz T, et al. The SEED  
548 and the Rapid Annotation of microbial genomes using Subsystems Technology  
549 (RAST). *Nucleic Acids Research*. 2014;42 D1:D206-D14.
- 550 49. Arndt D, Grant JR, Marcu A, Sajed T, Pon A, Liang Y, et al. PHASTER: a better,  
551 faster version of the PHAST phage search tool. *Nucleic Acids Research*.  
552 2016;44 W1:W16-W21.
- 553 50. Bouras G, Nepal R, Houtak G, Psaltis AJ, Wormald P-J and Vreugde S.  
554 Pharokka: a fast scalable bacteriophage annotation tool. *Bioinformatics*.  
555 2023;39 1:btac776.

557 **Table 1.** Browsers and operating systems (OS) tested with PhageGE

| <b>OS</b>      | <b>Chrome</b> | <b>Edge</b> | <b>Firefox</b> | <b>Safari</b> |
|----------------|---------------|-------------|----------------|---------------|
| <b>Linux</b>   | 120.0         | 120.0       | 121.0          | n/a           |
| <b>MacOS</b>   | 107.0         | 108.0       | 107.0.1        | 15.6.1        |
| <b>Windows</b> | 105.0         | 108.0       | 107.0.1        | n/a           |

558 n/a, not applicable

559

560 **Table 2.** Lifestyle prediction for 8 different phages

|                  | <b>Lytic</b> | <b>Temperate</b> |
|------------------|--------------|------------------|
| <b>KP36</b>      | 0.993        | 0.007            |
| <b>FK1979</b>    | 0.956        | 0.044            |
| <b>vB8838</b>    | 0.969        | 0.031            |
| <b>pKp20</b>     | 0.974        | 0.026            |
| <b>NC_017985</b> | 0            | 1                |
| <b>NC_027339</b> | 0.002        | 0.998            |
| <b>NC_009815</b> | 0.016        | 0.984            |
| <b>NC_019768</b> | 0.01         | 0.99             |

561

562

563 **Figures legends:**

564 **Figure 1. The workflow and application of PhageGE.**

565 Illustration of the workflow of PhageGE, highlighting its components and processes for  
566 phage genomic analysis. (1) **Phylogenetic analysis.** Input: Phage genome files in  
567 fasta format are uploaded; Pre-processing: The uploaded genome files are processed  
568 to estimate parameters and the are hashed for further analysis. Distance  
569 Estimation: K-mers features are normalised and then used for Jaccard index  
570 computation. Distance estimation: Distances are estimated based on the computed  
571 Jaccard index. (2) **Visualisation.** The results are visualised using the ggtree package  
572 and sample information files in CSV format. (3) **Lifestyle Prediction.** Biosequence  
573 analysis (HMMER): Biosequence analysis is performed using HMMER. Prediction  
574 model: A prediction model based on a phage genome-lifestyle dataset is applied.  
575 Lifestyle prediction: The lifestyle of the phages is predicted with the uploaded phage  
576 genome. (4) **Annotation Comparison.** Data manipulation: Genome annotation files  
577 (phaster.txt, RAST.xls, Pharokka.gff) are manipulated with built-in functions.  
578 Annotation comparison table: An annotation comparison table is generated using built-  
579 in functions.

580 **Figure 2. Overview of PhageGE and its related functions.**

581 The main functions and item information in PhageGE are illustrated in the figure,  
582 highlighting the steps for phylogenetic analysis, tree visualisation, lifestyle prediction,  
583 and annotation comparison. **A.** Phylogenetic Analysis: Users can select the genomes  
584 of interest by uploading phage whole genome data files (.fasta), selecting the layout  
585 of the tree (i.e., phylogram, cladogram, fan, radial and tidy), and clicking the "Explore  
586 Tree" button to initiate the phylogenetic analysis. **B.** Phylogenetic Tree Visualisation:

587 Users can upload a tree file (Newick or .tre format) and related genome information  
588 file (.csv). The tree visualisation displays the phylogenetic relationships among the  
589 uploaded genomes, with detailed annotations. **C. Lifestyle Prediction:** Users can select  
590 a genome of interest for lifestyle prediction by uploading a fasta file (.fasta). By clicking  
591 the "Explore Lifestyle Prediction" button, the user can predict the lifestyle of the  
592 selected genome, displaying the results with relevant statistics. **D. Annotation**  
593 **Comparison:** Users can upload multiple annotation files (Phaster, RAST, and  
594 Pharokka) and select the type of comparison. The resulting comparison table displays  
595 the annotated features from each source, facilitating detailed comparative analysis.

596 **Figure 3. Comparison of phylogeny estimations from PhageGE and MSA.**

597 **A.** Alignment-free phylogenetic trees of 15 phages inferred from WGS data, and **B.**  
598 the topology of the reference tree inferred from multiple sequence alignment of WGS.  
599 The trees illustrate the classification and related taxa positions, demonstrating the  
600 consistency and accuracy of PhageGE's alignment-free approach in relation to the  
601 traditional MSA-based method.

602 **Figure 4. Interactive visualisation of the phylogenetic tree of 15 phages.**

603 Each coloured dot represents one phage, with the colour indicating the associated  
604 taxa. The pink box illustrates the additional information that can be obtained by  
605 hovering the cursor over each dot.

606 **Figure 5. Comparison of classification accuracy of PhageGE with previously**  
607 **published tools across all datasets analysed.**

608 Incorrect classification involves misidentifying the phage lifestyle (temperate or lytic).

1 **PhageGE: An interactive web platform for exploratory analysis and visualisation**  
2 **of bacteriophage genomes**

3 Jinxin Zhao<sup>1, 2\*</sup>, Jiru Han<sup>3</sup>, Yu-Wei Lin<sup>1</sup>, Yan Zhu<sup>1, 4</sup>, Michael Aichem<sup>5</sup>, Dimitar Garkov<sup>5</sup>,  
4 Phillip J. Bergen<sup>1</sup>, Sue C. Nang<sup>1</sup>, Jian-Zhong Ye<sup>6, 7</sup>, Tieli Zhou<sup>6, 7</sup>, Tony Velkov<sup>8</sup>,  
5 Jiangning Song<sup>2, 9</sup>, Falk Schreiber<sup>5, 10</sup>, Jian Li<sup>1, 2\*</sup>

6 <sup>1</sup> Infection Program and Department of Microbiology, Biomedicine Discovery Institute,  
7 Monash University, Clayton, VIC, Australia

8 <sup>2</sup> Monash Biomedicine Discovery Institute-Wenzhou Medical University Alliance in  
9 Clinical and Experimental Biomedicine, Monash University, Clayton, VIC, Australia

10 <sup>3</sup> Population Health and Immunity Division, The Walter and Eliza Hall Institute of  
11 Medical Research, Parkville, VIC, Australia

12 <sup>4</sup> Systems Biology Center, Tianjin Institute of Industrial Biotechnology, Chinese  
13 Academy of Sciences, Tianjin, China

14 <sup>5</sup> Department of Computer and Information Science, University of Konstanz, Konstanz,  
15 Germany

16 <sup>6</sup> Key Laboratory of Clinical Laboratory Diagnosis and Translational Research of  
17 Zhejiang Province, Department of Clinical Laboratory, The First Affiliated Hospital of  
18 Wenzhou Medical University, Zhejiang, China

19 <sup>7</sup> Wenzhou Medical University-Monash Biomedicine Discovery Institute Alliance in  
20 Clinical and Experimental Biomedicine, The First Affiliated Hospital of Wenzhou  
21 Medical University, Wenzhou, China

22 <sup>8</sup> Department of Pharmacology, Biomedicine Discovery Institute, Monash University,  
23 Melbourne, VIC, Australia

24 <sup>9</sup> Department of Biochemistry and Molecular Biology, Biomedicine Discovery Institute,  
25 Monash University, Melbourne, VIC, Australia

26 <sup>10</sup> Faculty of Information Technology, Monash University, Clayton, VIC, Australia

28 **Email addresses:** JZ, [jinxin.zhao@monash.edu](mailto:jinxin.zhao@monash.edu); JH, [han.ji@wehi.edu.au](mailto:han.ji@wehi.edu.au); YL, [yu-](mailto:yu-wei.lin@monash.edu)  
29 [wei.lin@monash.edu](mailto:wei.lin@monash.edu); YZ, [Yan.Zhu@monash.edu](mailto:Yan.Zhu@monash.edu); MA, [konstanz.de](mailto:michael.aichem@uni-</a><br/>30 <a href=); DG, [dimitar.garkov@uni-konstanz.de](mailto:dimitar.garkov@uni-konstanz.de); PB, [phillip.bergen@monash.edu](mailto:phillip.bergen@monash.edu);  
31 SN, [sue.nang@monash.edu](mailto:sue.nang@monash.edu); JY, [jzye89@163.com](mailto:jzye89@163.com); TZ, [wytli@163.com](mailto:wytli@163.com); TV,  
32 [tony.velkov@monash.edu](mailto:tony.velkov@monash.edu); JS, [jiangning.song@monash.edu](mailto:jiangning.song@monash.edu); FS, [konstanz.de](mailto:falk.schreiber@uni-</a><br/>33 <a href=); JL, [jian.li@monash.edu](mailto:jian.li@monash.edu).

34 **Running title:** PhageGE for bacteriophage genomic analysis

35 \*Corresponding authors:

36 Dr Jinxin Zhao, Tel: +61 3 99056288, Email: [jinxin.zhao@monash.edu](mailto:jinxin.zhao@monash.edu);

37 Professor Jian Li, Tel: +61 3 99039172 Fax: +61 0399056450; Email:  
38 [jian.li@monash.edu](mailto:jian.li@monash.edu).

39

40



41 **Abstract**

42 **Background:** Antimicrobial resistance is a serious threat to global health. Due to the  
43 stagnant antibiotic discovery pipeline, bacteriophages (phages) have been proposed  
44 as an alternative therapy for the treatment of infections caused by multidrug-resistant  
45 (MDR) pathogens. Genomic features play an important role in phage pharmacology.  
46 However, our knowledge of phage genomics is sparse and the use of existing  
47 bioinformatic pipelines and tools requires considerable bioinformatic expertise. These  
48 challenges have substantially limited the clinical translation of phage therapy.

49 **Findings:** We have developed PhageGE (Phage Genome Explorer), a user-friendly  
50 graphical interface application for the interactive analysis of phage genomes.  
51 PhageGE enables users to perform key analyses, including phylogenetic analysis,  
52 visualisation of phylogenetic trees, prediction of phage lifecycle, and comparative  
53 analysis of phage genome annotations. The new R Shiny webserver, PhageGE,  
54 integrates existing R packages and combines them with several newly developed  
55 functions to facilitate these analyses. Additionally, the webserver provides interactive  
56 visualisation capabilities and allows users to directly export publication-quality images.

57 **Conclusions:** PhageGE is a valuable tool that simplifies the analysis of phage  
58 genome data and may expedite the development and clinical translation of phage  
59 therapy. PhageGE is publicly available at <http://www.phagege.com/>.

60 **Keywords:** Phage genome, biological web application, genomic analysis, phylogeny,  
61 lifestyle

62

## 63 **Introduction**

64 The rapid emergence and spread of antimicrobial resistance (AMR) is one of the three  
65 greatest threats to human health globally [1]. It is estimated that by 2050, life-  
66 threatening infections caused by antimicrobial-resistant pathogens will kill more  
67 people than any other diseases [2]. Of particular concern is the increased prevalence  
68 of infections caused by Gram-negative pathogens, which are more difficult to treat  
69 than Gram-positive pathogens [3]. Given the sluggish global antibiotic pipeline [4],  
70 bacteriophages (phages) have attracted significant attention over the last decade as  
71 a potential alternative therapy for bacterial infections [5]. Phages are bacterial viruses  
72 and the advantages of phage therapy over antibiotics include a narrow spectrum of  
73 activity, the capacity to multiply at the infection site, and safety [6-8]. Optimising phage  
74 therapy in patients requires key pharmacological information, including infection cycle,  
75 gene content, and phage taxonomy [9, 10]. For example, temperate phages do not  
76 immediately lyse bacterial host cells and have an inherent capacity to mediate the  
77 transfer of genes between bacteria, potentially facilitating increased bacterial virulence  
78 and AMR. In contrast, lytic phages kill bacteria upon infection and are commonly used  
79 for the treatment of MDR bacterial infections in patients [11-14].

80 Multi-omics has the potential to expedite the clinical translation of phage therapy for  
81 the treatment of MDR bacterial infections [15]. For example, whole genome-based  
82 phylogenetic analysis offers significant advantages in understanding phage  
83 evolutionary dynamics and designing potential phage cocktails [16, 17]. Furthermore,  
84 combining whole-genome sequencing (WGS) with *in silico* prediction enables rapid  
85 prediction of phage lifestyle [18]. Several popular bioinformatic pipelines and tools are  
86 available for multiple sequence alignment (MAFFT) [19], phylogenetic reconstruction  
87 (RAxML and IQ-TREE) [20, 21], visualisation of phylogeny (ggtree) [22], and phage

88 lifestyle prediction (PHACTS and BACPHLIP) [18, 23]; however, utilising these tools  
89 requires proficient programming skills. Therefore, a user-friendly platform for phage  
90 genomic analyses is urgently needed to overcome the challenges associated with the  
91 requirement for advanced programming expertise.

92 Here, we developed an integrated webserver platform, PhageGE, that offers four key  
93 functionalities: phage phylogenetic analysis, tree visualisation, lifestyle prediction, and  
94 manipulation of phage genome annotation datasets. PhageGE differs from existing  
95 phage genomic analysis tools in that it facilitates the seamless export of all associated  
96 results in a publication-ready format without requiring complex procedures or long  
97 running times. Overall, PhageGE provides a user-friendly interface to streamline  
98 phage genomic analysis with WGS data.

99

## 100 **Results**

101 The PhageGE webserver (biotoolsID: biotools:phagege and RRID: SCR\_025380) was  
102 designed to ensure user-friendliness and compatibility with major web browsers,  
103 including Google Chrome, Mozilla Firefox, Apple Safari, and Microsoft Edge (**Table 1**).

### 104 **Webserver submission and case studies**

105 To demonstrate the functions and the scope of application of PhageGE, we herein  
106 describe the results of a case study using PhageGE, including phage whole genome  
107 data (i.e., .fasta), a phylogenetic tree file (i.e., .tre), and genome annotation data  
108 (i.e., .xls, .txt and .gff), which are collectively referred to as “Example Data” (**Figure**  
109 **1**). The complete set of Example Data used in the case studies can be accessed on  
110 the PhageGE GitHub repository (<https://github.com/JinxinMonash/PhageGE>).

## 111 **Phage phylogenetic analysis and visualisation**

112 To illustrate the phylogenetic analysis function in PhageGE and its application in  
113 clinical translation, we analysed our GitHub example dataset, which consists of 15  
114 phage genomes. The hosts of the 15 phage genomes in the phylogenetic analysis are  
115 from 3 different bacterial species: *Citrobacter freundii*, *Escherichia coli*, and *Klebsiella*  
116 *pneumoniae* (**Figure 2A**). This dataset includes one anti-Klebsiella phage, pKp20,  
117 which was isolated in our lab and used in a clinical case [24]. In that case, a recurrent  
118 urinary tract infection [rUTI] was successfully treated with 4 weeks of adjunctive  
119 intravenous bacteriophage therapy, with no recurrence during a year of follow-up [24].  
120 Both taxonomy information from phylogeny analysis and the lifestyle prediction played  
121 key roles in the selection of pKp20 over a wide range of phages [24]. The phage WGS  
122 **data in the fasta format** can be obtained either from NCBI or prepared locally using  
123 standard genome assembly pipelines (e.g., SPAdes) based on the previous BLASTn  
124 result [24]. To compare the results obtained from PhageGE with the multiple sequence  
125 alignment-based approach, we also conducted a multiple sequence alignment-based  
126 phylogenetic analysis using MAFFT v7.47 and fasttree v2.1.10, alongside the  
127 phylogenetic analysis using PhageGE. We firstly uploaded the selected fasta files or  
128 a multi-fasta file which contains all phage genomes on the Phylogenetic Analysis page  
129 in PhageGE, then selected the layout of the tree (i.e., phylogram, cladogram, fan,  
130 radial, or tidy) and clicked the “Explore Tree” icon. The resulting phylogenetic tree,  
131 representing the relationships among the uploaded genomes, was generated using  
132 the built-in *k*-mer-based alignment-free phylogenetic approach, as detailed in the  
133 Methods section (**Figures 2A and 3A**). To enhance the clarity, we manually  
134 highlighted the 15 phages with distinct colours according to their genus. Comparison  
135 of the phylogenetic trees generated by PhageGE and MAFFT revealed that both trees

136 shared largely the same classification (e.g., positions of each phage and the related  
137 taxa) (**Figure 3**). Moreover, PhageGE demonstrates a significant improvement in  
138 runtime efficiency. For example, on a 2-GHz CPU with 64 GB RAM server, the  
139 runtimes of generating phylogenetics trees by PhageGE were 0.22 minutes for 15  
140 phage genomes and 4.42 minutes for 146 phage genomes. In contrast, the MSA-  
141 based approach (using tools like MAFFT along with FastTree) took 30 minutes and  
142 296 minutes, respectively. This demonstrates that the performance of the phylogenetic  
143 analysis of PhageGE is accurate, fast and comparable to the multiple sequence  
144 alignment-based approach.

145 The phylogenetic visualisation function handles the phylogenetic tree along with  
146 diverse accompanying data. Its aim is to provide an interactive visualisation platform  
147 that enhances the accessibility of phylogenetic data and facilitates the phylogenetic  
148 analysis of phage comparative genomics studies. The phylogenetic tree and  
149 associated data can be extracted using a built-in function within PhageGE. This  
150 function is illustrated using a tree file “phage.tre” obtained from phage phylogenetic  
151 analysis (whether generated by PhageGE or other phylogenetic analysis pipeline) and  
152 a sample information file named “sample\_info.csv” containing the taxonomy  
153 information for all 14 phages (**Figure 2B**). As shown in **Figure 4**, each dot in the  
154 dendrogram represents one phage with the colour indicating its taxonomic  
155 classification in the same genus. In addition, detailed information of each phage (e.g.,  
156 name and taxonomy) can be easily accessed by hovering the cursor over the dot of  
157 interest (as indicated by the pink box in **Figure 4**). This interactive feature allows users  
158 to dynamically integrate and visualise the underlying information in a user-friendly  
159 manner.

## 160 **Performance of phage lifestyle prediction**

161 The lifestyle prediction function builds on a Random Forest classifier that incorporates  
162 up-to-date conserved protein domains with the ability to classify temperate and lytic  
163 phages using WGS data. To evaluate its performance, we compared the function with  
164 other published tools using the dataset of 1,057 phages in the literature [25]. The  
165 PhageGE lifestyle prediction function achieved the lowest error rates (0%, 1.2%, 0.3%  
166 and 2.5%, equivalent to 100%, 98.8%, 99.7% and 97.5% classification accuracy,  
167 respectively) across all tested datasets, substantially outperforming those existing  
168 tools for phage lifestyle classification (**Figure 5**). The prediction accuracy of PhageGE  
169 exceeded that of the most accurate existing tool, BACPHLIP, which had prediction  
170 accuracies of 99.8%, 98.3%, 99.2% and 96.5%, respectively (**Figure 5**). Similarly,  
171 WGS data for individual phages (e.g., *Klebsiella* phage KP36.fasta, vB8388.fasta, and  
172 FK1979.fasta from the example dataset described here) can be uploaded as input to  
173 generate the phage lifestyle probability table (**Figure 2C** and **Table 2**). The result  
174 presented in **Table 2** predicts that *Klebsiella* phages KP36 (a model phage in our  
175 laboratory), FK1979, and vB8388 [26] (two phages isolated from hospital sewage, The  
176 First Affiliated Hospital of Wenzhou Medical University, China), and pKp20 (used in  
177 the rUTI clinical case study) [24], are highly likely lytic phages, with the probability of  
178 99.3%, 95.6% and 96.9%, respectively. Meanwhile, the four phages from the NCBI in  
179 **Table 2** NC\_017985, NC\_027339, NC\_009815, and NC\_019768 are highly likely  
180 temperate phages. This function empowers users to rapidly analyse the lifestyle of a  
181 phage of interest *in silico* with high prediction accuracy, providing key insights into the  
182 intricate phage ecosystems and enabling optimal design of phage therapy.

### 183 **Comparison of phage genome annotation**

184 Notably, PhageGE also provides a function to compare phage genome annotations  
185 obtained from different pipelines (i.e., Pharokka, Phaster and RAST). This analysis

186 involves the integration of R package flextable, which allows for the generation of  
187 downloadable comparison results in multiple formats (e.g., csv, Excel and PDF). The  
188 user interface offers the flexibility to rank the results based on multiple parameters  
189 (e.g., location and/or length of the coding sequence [CDS]). In the case study  
190 presented here, we used PhageGE to compare genome annotations of *Klebsiella*  
191 phages KP36, vB8838, and FK1979 generated from Phaster, RAST, and Pharokka  
192 (**Figure 2D**). By selecting “common\_annotation”, a table with 75, 45, and 51 genes  
193 that were annotated in all three pipelines was generated for KP36, vB8838, and  
194 FK1979, respectively. We also identified 17, 7, and 12 unique genes from the  
195 Pharokka pipeline by selecting the “Pharokka\_only” option. To gain a better  
196 understanding of those unique annotated genes, PhageGE allows users to directly  
197 copy and download both the nucleotide and amino acid sequences associated with  
198 the genes from the interactive table. This feature facilitates further investigation of  
199 these unique annotations.

200

## 201 **Discussion**

202 With the dramatic rise in MDR bacterial infections, phage therapy has emerged as a  
203 safe and potentially effective alternative treatment option to antibiotics [27]. However,  
204 the development of effective phage therapies is complex, involving the isolation,  
205 culturing, characterisation, and timely preparation of efficacious phages. Traditionally,  
206 this process is time-consuming and costly [28, 29]. Nevertheless, with the next-  
207 generation sequencing techniques, it has become possible to rapidly and cost-  
208 effectively characterise phages. Despite this advancement, there is a paucity of  
209 intuitive tools available for phage genomics, with the majority requiring operation in

210 command-line mode. The availability of large phage genomic datasets presents  
211 unique opportunities to develop bioinformatics tools that aid in phage biology and  
212 pharmacology research. The use of computational methods to study phages has  
213 shown promise in generating novel insights, such as phylogeny and lifestyle, through  
214 bioinformatic analysis [18, 25, 30]. However, there is currently no single tool available  
215 that encompasses all those functions (e.g., phylogenetic analysis, tree visualisation,  
216 lifestyle prediction, and genome annotation comparison) in the webserver platform.  
217 Herein, we describe the development of the PhageGE webserver GUI streamlined for  
218 user-friendly phage genomic analysis.

219 PhageGE is a novel, **user-friendly GUI** application for the interactive analysis of phage  
220 genomes. The overarching goal of PhageGE is to provide an interactive analysis and  
221 visualisation platform for the rapid exploration of phage genomic associations, thereby  
222 promoting efficient genomic data-driven discovery of phage therapy. PhageGE  
223 comprises a set of functions for phage genomic analysis, including phylogenetic  
224 analysis, tree visualisation, lifestyle prediction, and genome annotation comparison.  
225 While current tools like PhaGAA can provide lifestyle reorganisation analysis, their  
226 primary utility lies in analysing phage lifestyle for their preferred phage dataset (e.g.,  
227 gut flora of human neonates) [31]. In contrast, PhageGE integrates a more  
228 **comprehensive** dataset with a wide range of phage genomes, allowing for broader and  
229 deeper exploration of phage lifestyles. Moreover, the comparison of annotations from  
230 different pipelines highlights the key role of PhageGE in advancing phage genomics  
231 through enhanced analysis and visualisation functions. To exemplify the utility of  
232 PhageGE, we investigated the phylogeny, lifestyle, and annotation comparison of  
233 *Klebsiella* phages KP36, vB8838, and FK1979, which were independently isolated in  
234 two different countries. Our findings demonstrate that the various functions of



235 PhageGE yield comparable or better results than existing state-of-the-art approaches.  
236 These results highlight the significant potential of PhageGE in analysing various phage  
237 genomic features using phage WGS data.

238 Notably, PhageGE requires only phage WGS data as the input for conducting the  
239 related analysis. The phage phylogenetic analysis function takes phage WGS in the  
240 fasta format as input and applies an alignment-free phylogenetic approach to infer  
241 phylogenetic relationships. Compared to current phylogenetic analysis pipelines (i.e.,  
242 multiple sequence alignment-based phylogenetic analysis), analysis from PhageGE  
243 showed similar phage phylogeny information in a shorter computing time  
244 (approximately 13 seconds versus 30 minutes for 15 phage genomes). Moreover, the  
245 result from phylogenetic analysis can be easily exported in various graphical formats  
246 (e.g., SVG, PDF and JPEG) and textual formats (e.g., Newick and Nexus) and can  
247 be interactively managed and viewed through our designed user interface. In addition,  
248 PhageGE introduces an enhanced phage lifestyle prediction function, using a  
249 machine-learning approach with updated databases for conserved protein domains.  
250 The overall approaches applied for both phylogenetic analysis and lifestyle prediction  
251 demonstrate that analyses results from PhageGE are comparable to previously  
252 published tools (**Figures 3 and 5**), showing its effectiveness in accurately analysing  
253 phage phylogeny and predicting phage lifestyle. Notably, PhageGE incorporates a  
254 function of annotation comparison to facilitate the efficient organisation of genome  
255 annotation files derived from different annotation pipelines. This feature allows users  
256 to efficiently compare genome annotation data obtained with different tools. Overall,  
257 all four functions from PhageGE serve as a guide for the exploration of phage  
258 genomic features and will expedite the clinical translation of phage therapy.

259

## 260 **Conclusion**

261 In conclusion, PhageGE is the **first user-friendly** tool for the analysis of phage  
262 genomes, offering improved functions compared to existing tools without the need for  
263 considerable programming skills. Uniquely incorporating features like phylogenetic  
264 analysis, interactive tree visualisation, lifestyle prediction, and genome annotation  
265 comparison, we anticipate that PhageGE will become an instrumental bioinformatic  
266 web server for phage genomic analysis, guiding experimental validations and  
267 advancing the development of phage therapy.

268

## 269 **Methods**

### 270 **Implementation**

271 PhageGE 1.0 was developed in R and is hosted on Shinyapps. This application  
272 seamlessly integrates various R packages, including Rshiny, seqinr, Biostrings, ape,  
273 textmineR, tidyverse, ggtree, ploty, ggplot, reticulate, and pyhmmmer [22, 32-38].  
274 Furthermore, it incorporates several key functions, including *k*-mer-based phylogeny  
275 estimation, phylogenetic tree visualisation, lifestyle prediction, and annotation  
276 comparison. To use PhageGE, input files in the standard WGS fasta format are  
277 required, along with textual tables in standard formats (e.g., csv or xlsx) containing  
278 sequence details and annotation information. The workflow is illustrated in **Figure 1**.

### 279 **Phage genomic analysis pipeline**

280 The functionalities offered in the web interface of PhageGE utilise WGS fasta files for  
281 phylogenetic analysis and lifestyle prediction. Users can input tree files (e.g., Newick  
282 or Nexus) and textual files (i.e., csv or xlsx) for phylogenetic tree visualisation and

283 genome annotation comparisons. Using these standard formats as input files  
284 facilitates effective use and simplifies data export for users.

### 285 **Phylogenetic analysis and phylogenetic tree visualisation**

286 The phylogenetic analysis function enables fast and efficient analysis of phage  
287 phylogeny. It includes phylogeny reconstruction based on the input WGS data and  
288 visualisation of phylogenetic information. This function incorporates a  $k$ -mer-based  
289 alignment-free phylogenetic approach [39]. Alignment-free phylogenetic approaches  
290 offer a scalable alternative for inferring phylogenetic relationships and computing local  
291 alignment boundaries from WGS data [40, 41]. This approach is particularly robust for  
292 genome sequences that exhibit genetic recombinations and rearrangements. It has  
293 demonstrated the ability to accurately reconstruct biologically relevant phylogenies  
294 with thousands of microbial genomes [42-44]. The description of this function is briefly  
295 outlined below.

296 Consider a sequence consisting of four characters (A, T, C, G) of length  $k$  (' $k$ -mer'),  
297 described by **Equation 1**. There are  $4^k$  possible  $k$ -mers (**Equation 2**), which can serve  
298 as features of each genome. The value assigned to a specific  $k$ -mer feature will  
299 correspond to the number of occurrences of that  $k$ -mer in the genome. Using these  
300  $k$ -mer features, a data matrix is generated with dimensions of the numbers of genomes  
301 of interest ( $n$  columns) by  $4^k$  rows. To establish a representative probability distribution  
302 of the  $4^k$   $k$ -mers, each row of the data matrix is normalised by its row total. This  
303 normalisation results in a feature-frequency profile ( $F_k$ , described by **Equation 3**) for  
304 each  $k$ -mers sequence [39]. The Jensen-Shannon divergence ( $D_k$ , described by  
305 **Equation 4**) is then employed to estimate the genome pairwise distances [45].  
306 Subsequently, the resulting distance matrix is used as an input for a clustering

307 algorithm (e.g., neighbor-joining algorithm) to summarise the relatedness of the phage  
308 genomes and construct a phylogenetic tree [35].

309 **Equation 1:**  $C_k = \langle C_{k,1}, C_{k,2} \dots C_{k,m} \rangle$

310 **Equation 2:**  $m = 4^k$

311 **Equation 3:**  $F_{n_i,k} = \frac{C_{n_i,k,m}}{\sum_{n_i} C_{n_i,k}}$

312 **Equation 4:**  $D_k = JS(F_{n_1,k}, F_{n_i,k})$

313

314 An interactive visualisation of a phylogenetic tree was generated either from the  
315 phylogenetic analysis function or a customised phylogenetic tree that includes  
316 additional information, such as species classification, duplication events, and  
317 bootstrap values. It is implemented using ggtree and ploty R packages [22], ensuring  
318 the ability to handle most common tree formats (e.g., Newick, Nexus, and tre).

### 319 **Lifestyle prediction**

320 The Lifestyle Prediction function in PhageGE generates a phage lifestyle probability  
321 table based on the input of phage WGS data. This function adapted previously  
322 reported approaches into our user-friendly interface [18, 23, 25]. By employing an  
323 improved search function (i.e. searching a sequence file against the build-in Hidden  
324 Markov Model [HMM] database), PhageGE provides an efficient way to predict phage  
325 lifestyle based on the phage genomic information.

326 In brief, we first conducted a search in the Conserved Domain Database (accessed:  
327 11/2023) to collect protein domains from temperate phages [46]. The following key

328 words were used to identify relevant protein domains: ‘temperate’, ‘lysogen’,  
329 ‘integrase’, ‘excisionase’, ‘recombinase’, ‘transposase’, ‘parA|parB’, and ‘xerC|xerD’.  
330 We obtained a total of 477 protein domains from the initial collection, which were then  
331 subjected to a careful manual curation and filtration (e.g., minimal domain length >30  
332 and validated in the existing experimental data), resulting in a refined set of 261 protein  
333 domains. Next, a lifestyle classification model was trained and tested using a  
334 published dataset consisting of 1,057 phages from 6 different families (*Inoviridae*,  
335 *Myoviridae*, *Plasmaviridae*, *Podoviridae*, *Siphoviridae*, and *Tectiviridae*) across 55  
336 host genera, with known genome and lifestyle information [25]. The dataset was  
337 randomly split into training and testing sets, with a ratio of 60:40 (634 phages in the  
338 training set and 423 phages in the testing set). At this stage, the testing set was fully  
339 set aside for subsequent descriptions related to model training and development. For  
340 each genome sequence in the training set, we generated a list of all possible 6-frame  
341 translation sequences that were at least 40 amino acids long. HMMER3 was then used  
342 to search for the presence or absence of the various protein domains listed above,  
343 resulting in a vector for each phage describing the presence (1) or absence (0) of each  
344 domain [47]. This information allowed us to filter the initial set of 477 putatively useful  
345 protein domains down to the final set of 261. Subsequently, a Random Forest classifier  
346 was fitted to the training set of phage genomes, and cross-validation was employed to  
347 fine-tune the model hyper-parameters. The ‘best’ performing model was then selected  
348 by choosing the hyper-parameters that yielded the highest minimum accuracy across  
349 the independent validation set tests. The parameters of that model were then re-fitted  
350 to the entire training set data, resulting in the final model.

### 351 **Annotation comparison**

352 The Rapid Annotation using Subsystem Technology (RAST) server was developed in  
353 2008 to annotate microbial genomes based on the manually curated SEED database  
354 [48]. The PHAge Search Tool – Enhanced Release (PHASTER) was specifically  
355 designed to identify and annotate prophage sequences within bacteria using  
356 prophage/virus databases [49]. More recently, another phage annotation tool,  
357 Pharokka, has been developed using PHROGS, CARD, and VFDB databases [50].  
358 Since these pipelines employ different databases for phage genome annotation, it is  
359 possible to obtain different annotations from each pipeline. To provide more  
360 comprehensive annotation results, there is an urgent need for annotation comparison  
361 tables that incorporate all annotation information from RAST, PHASTER, and  
362 Pharokka. The Annotation Comparison function in PhageGE generates interactive  
363 tables that display comments and differing genome annotation information obtained  
364 from RAST, PHASTER, and Pharokka. This comparison includes checking the coding  
365 regions and related annotations from each pipeline. Moreover, it provides an overview  
366 of common and different annotation counts, facilitating the tracking of differences  
367 between the three pipelines. This function is implemented using the flextable,  
368 tidyselect, data.table, and tidyverse packages [37].

369

## 370 **Code availability and requirements**

- 371 • Project name: PhageGE (Phage Genome Exploration)
- 372 • Project homepage: <https://github.com/JinxinMonash/PhageGE>
- 373 • Operating system(s): Linux, Windows and MacOS (**Table 1**)
- 374 • Programming language: R
- 375 • License: MIT license

## 376 **Data availability**

377 In general, all data used in this work were from openly accessible public repositories  
378 and released with other publications under open-source licenses. The data used were  
379 solely for research purposes, and we confirm that they were not used for any other  
380 noncommercial or commercial purpose. The datasets supporting the results of this  
381 article are available in the Github repository,  
382 [\[https://github.com/JinxinMonash/PhageGE\]](https://github.com/JinxinMonash/PhageGE). The data used as examples can be  
383 found in the release branch called “Example data” or “Example data.zip” within our  
384 repository. The GitHub repository also contains up-to-date tutorials.

385

## 386 **Competing interests**

387 The authors declare that they have no competing interests.

388

## 389 **Funding**

390 This work was supported by the National Institute of Allergy and Infectious Diseases  
391 of the National Institutes of Health [grant number R21 AI156766 to J.L.]. The content  
392 is solely the responsibility of the authors and does not necessarily represent the official  
393 views of the National Institute of Allergy and Infectious Diseases or the National  
394 Institutes of Health.

395

## 396 **Author's contributions**

397 J.Z. collected all the data and participated in developing the webserver and writing the  
398 manuscript. J.H., Y.W.L., Y.Z., M.A. and D.G. and J.N.S. contributed to the

399 development of the web server. P.J.B., S.N., J.Z.Y., T.L.Z. and T.V. took part in the  
400 discussion of the data. J.Z., F.S. and J.L. conceived the study, coordinated the work  
401 and contributed to writing the manuscript. All authors are involved in the discussion  
402 and finalisation of the manuscript.

403

#### 404 **Acknowledgements**

405 J.Z. is a recipient of the 2022 Faculty of Medicine, Nursing and Health Sciences  
406 Bridging Fellowship, Monash University. J.L. is an Australian National Health Medical  
407 Research Council (NHMRC) Investigator Research Fellow and T.V. is an Australian  
408 Research Council (ARC) Industrial Fellow. Y.W.L. is currently an employee of Certara,  
409 Australia and Co-Director of the Malaya Translational and Clinical Pharmacometrics  
410 Group, University of Malaya, Malaysia.

411



412 **References**

- 413 1. Murray CJ, Ikuta KS, Sharara F, Swetschinski L, Aguilar GR, Gray A, et al.  
414 Global burden of bacterial antimicrobial resistance in 2019: a systematic  
415 analysis. *The Lancet*. 2022;399 10325:629-55.
- 416 2. Luepke KH, Suda KJ, Boucher H, Russo RL, Bonney MW, Hunt TD, et al. Past,  
417 present, and future of antibacterial economics: increasing bacterial resistance,  
418 limited antibiotic pipeline, and societal implications. *Pharmacotherapy: The*  
419 *Journal of Human Pharmacology and Drug Therapy*. 2017;37 1:71-84.
- 420 3. Bassetti M and Garau J. Current and future perspectives in the treatment of  
421 multidrug-resistant Gram-negative infections. *Journal of Antimicrobial*  
422 *Chemotherapy*. 2021;76 (Suppl 4):iv23-iv37.
- 423 4. Böttcher L, Gersbach H and Wernli D. Restoring the antibiotic R&D market to  
424 combat the resistance crisis. *Science and Public Policy*. 2022;49 1:127-31.
- 425 5. Uyttebroek S, Chen B, Onsea J, Ruythooren F, Debaveye Y, Devolder D, et al.  
426 Safety and efficacy of phage therapy in difficult-to-treat infections: a systematic  
427 review. *The Lancet Infectious Diseases*. 2022; 22 8:E208-E220.
- 428 6. Kortright KE, Chan BK, Koff JL and Turner PE. Phage therapy: a renewed  
429 approach to combat antibiotic-resistant bacteria. *Cell Host & Microbe*. 2019;25  
430 2:219-32.
- 431 7. Mousavi SM, Babakhani S, Moradi L, Karami S, Shahbandeh M, Mirshekar M,  
432 et al. Bacteriophage as a novel therapeutic weapon for killing colistin-resistant  
433 multi-drug-resistant and extensively drug-resistant gram-negative bacteria.  
434 *Current Microbiology*. 2021;78 12:4023-36.
- 435 8. Lin Y, Chang RY, Rao G, Jermain B, Han M-L, Zhao J, et al.  
436 Pharmacokinetics/pharmacodynamics of antipseudomonal bacteriophage

- 437 therapy in rats: a proof-of-concept study. *Clinical Microbiology and Infection*.  
438 2020;26 9:1229-35.
- 439 9. Hyman P. Phages for phage therapy: isolation, characterization, and host range  
440 breadth. *Pharmaceuticals*. 2019;12 1:35.
- 441 10. Gordillo Altamirano FL and Barr JJ. Phage therapy in the postantibiotic era.  
442 *Clinical Microbiology Reviews*. 2019;32 2:e00066-18.
- 443 11. Roach DR, Leung CY, Henry M, Morello E, Singh D, Di Santo JP, et al. Synergy  
444 between the host immune system and bacteriophage is essential for successful  
445 phage therapy against an acute respiratory pathogen. *Cell Host & Microbe*.  
446 2017;22 1:38-47. e4.
- 447 12. Harrison E and Brockhurst MA. Ecological and evolutionary benefits of  
448 temperate phage: what does or doesn't kill you makes you stronger. *BioEssays*.  
449 2017;39 12:1700112.
- 450 13. Gill JJ and Hyman P. Phage choice, isolation, and preparation for phage  
451 therapy. *Current Pharmaceutical Biotechnology*. 2010;11 1:2-14.
- 452 14. Abedon ST, García P, Mullany P and Aminov R. Phage therapy: past, present  
453 and future. *Frontiers Media SA*, 2017, p. 981.
- 454 15. Debnath M, Prasad GB and Bisen PS. Omics technology. *Molecular*  
455 *Diagnostics: Promises and Possibilities*. Springer; 2010. p. 11-31.
- 456 16. Parmar KM, Dafale NA, Tikariha H and Purohit HJ. Genomic characterization  
457 of key bacteriophages to formulate the potential biocontrol agent to combat  
458 enteric pathogenic bacteria. *Archives of Microbiology*. 2018;200 4:611-22.
- 459 17. Philipson CW, Voegtly LJ, Lueder MR, Long KA, Rice GK, Frey KG, et al.  
460 Characterizing phage genomes for therapeutic applications. *Viruses*. 2018;10  
461 4:188.

- 462 18. McNair K, Bailey BA and Edwards RA. PHACTS, a computational approach to  
463 classifying the lifestyle of phages. *Bioinformatics*. 2012;28 5:614-8.
- 464 19. Katoh K and Standley DM. MAFFT multiple sequence alignment software  
465 version 7: improvements in performance and usability. *Molecular Biology and*  
466 *Evolution*. 2013;30 4:772-80.
- 467 20. Stamatakis A. RAxML version 8: a tool for phylogenetic analysis and post-  
468 analysis of large phylogenies. *Bioinformatics*. 2014;30 9:1312-3.
- 469 21. Minh BQ, Schmidt HA, Chernomor O, Schrempf D, Woodhams MD, Von  
470 Haeseler A, et al. IQ-TREE 2: new models and efficient methods for  
471 phylogenetic inference in the genomic era. *Molecular Biology and Evolution*.  
472 2020;37 5:1530-4.
- 473 22. Xu S, Li L, Luo X, Chen M, Tang W, Zhan L, et al. Ggtree: A serialized data  
474 object for visualization of a phylogenetic tree and annotation data. *iMeta*.  
475 2022;3 1:e56.
- 476 23. Hockenberry AJ and Wilke CO. BACPHLIP: predicting bacteriophage lifestyle  
477 from conserved protein domains. *PeerJ*. 2021;9:e11396.
- 478 24. Le T, Nang SC, Zhao J, Yu HH, Li J, Gill JJ, et al. Therapeutic potential of  
479 intravenous phage as standalone therapy for recurrent drug-resistant urinary  
480 tract infections. *Antimicrobial Agents and Chemotherapy*. 2023;67 4:e00037-  
481 23.
- 482 25. Mavrigh TN and Hatfull GF. Bacteriophage evolution differs by host, lifestyle  
483 and genome. *Nature Microbiology*. 2017;2 9:1-9.
- 484 26. Zhao Y, Feng L, Zhou B, Zhang X, Yao Z, Wang L, et al. A newly isolated  
485 bacteriophage vB8388 and its synergistic effect with aminoglycosides against

- 486 multi-drug resistant *Klebsiella oxytoca* strain FK-8388. *Microbial Pathogenesis*.  
487 2023;174:105906.
- 488 27. Khan A, Rao TS and Joshi HM. Phage therapy in the Covid-19 era: Advantages  
489 over antibiotics. *Current Research in Microbial Sciences*. 2022;3:100115.
- 490 28. Camarillo-Guerrero LF, Almeida A, Rangel-Pineros G, Finn RD and Lawley TD.  
491 Massive expansion of human gut bacteriophage diversity. *Cell*. 2021;184  
492 4:1098-109.
- 493 29. Carrigy NB, Larsen SE, Reese V, Pecor T, Harrison M, Kuehl PJ, et al.  
494 Prophylaxis of *Mycobacterium tuberculosis* H37Rv infection in a preclinical  
495 mouse model via inhalation of nebulized bacteriophage D29. *Antimicrobial  
496 Agents and Chemotherapy*. 2019;63 12:e00871-19.
- 497 30. Martinez-Vaz BM and Mickelson MM. In silico phage hunting: bioinformatics  
498 exercises to identify and explore bacteriophage genomes. *Frontiers in  
499 Microbiology*. 2020;11:577634.
- 500 31. Wu J, Liu Q, Li M, Xu J, Wang C, Zhang J, et al. PhaGAA: an integrated web  
501 server platform for phage genome annotation and analysis. *Bioinformatics*.  
502 2023;39 3:btad120.
- 503 32. Sievert C. Interactive web-based data visualization with R, plotly, and shiny.  
504 *Journal of the Royal Statistical Society Series A: Statistics in Society*.  
505 2020;184:1150.
- 506 33. Charif D and Lobry JR. SeqinR 1.0-2: a contributed package to the R project  
507 for statistical computing devoted to biological sequences retrieval and analysis.  
508 *Structural approaches to sequence evolution*. Springer; 2007. p. 207-32.

- 509 34. Pagès H, Aboyoun P, Gentleman R, DebRoy S. Biostrings: Efficient  
510 manipulation of biological strings. 2024. Biostrings (Version 2.70.2)  
511 <https://bioconductor.org/packages/Biostrings>.
- 512 35. Paradis E and Schliep K. ape 5.0: an environment for modern phylogenetics  
513 and evolutionary analyses in R. *Bioinformatics*. 2019;35 3:526-8.
- 514 36. Jones T, Doane W and Jones MT. Package 'textmineR'. Functions for text  
515 mining and topic modeling. 2021. textmineR (Version 3.0.5)  
516 <https://github.com/TommyJones/textmineR>.
- 517 37. Wickham H and Wickham MH. Welcome to the tidyverse. *Journal of Open*  
518 *Source Software*. 2019. 4(43), 1686.
- 519 38. Wickham H and Wickham MH. *ggplot2: Elegant Graphics for Data Analysis*.  
520 Springer-Verlag New York . 2016. <https://ggplot2.tidyverse.org/>
- 521 39. Sims GE, Jun S-R, Wu GA and Kim S-H. Alignment-free genome comparison  
522 with feature frequency profiles (FFP) and optimal resolutions. *Proceedings of*  
523 *the National Academy of Sciences*. 2009;106 8:2677-82.
- 524 40. Mapleson D, Garcia Accinelli G, Kettleborough G, Wright J and Clavijo BJ. KAT:  
525 a K-mer analysis toolkit to quality control NGS datasets and genome  
526 assemblies. *Bioinformatics*. 2017;33 4:574-6.
- 527 41. Jain C, Koren S, Dilthey A, Phillippy AM and Aluru S. A fast adaptive algorithm  
528 for computing whole-genome homology maps. *Bioinformatics*. 2018;34  
529 17:i748-i56.
- 530 42. Bernard G, Chan CX and Ragan MA. Alignment-free microbial phylogenomics  
531 under scenarios of sequence divergence, genome rearrangement and lateral  
532 genetic transfer. *Scientific Reports*. 2016;6 1:1-12.

- 533 43. Jacobus AP, Stephens TG, Youssef P, González-Pech R, Ciccotosto-Camp  
534 MM, Dougan KE, et al. Comparative genomics supports that Brazilian  
535 bioethanol *Saccharomyces cerevisiae* comprise a unified group of  
536 domesticated strains related to cachaça spirit yeasts. *Frontiers in Microbiology*.  
537 2021;12:644089.
- 538 44. Bernard G, Greenfield P, Ragan MA and Chan CX. k-mer similarity, networks  
539 of microbial genomes, and taxonomic rank. *Msystems*. 2018;3 6:e00257-18.
- 540 45. Sims GE and Kim S-H. Whole-genome phylogeny of *Escherichia coli*/*Shigella*  
541 group by feature frequency profiles (FFPs). *Proceedings of the National*  
542 *Academy of Sciences*. 2011;108 20:8329-34.
- 543 46. Lu S, Wang J, Chitsaz F, Derbyshire MK, Geer RC, Gonzales NR, et al.  
544 CDD/SPARCLE: the conserved domain database in 2020. *Nucleic Acids*  
545 *Research*. 2020;48 D1:D265-D8.
- 546 47. Eddy SR. Profile hidden Markov models. *Bioinformatics*. 1998;14 9:755-63.
- 547 48. Overbeek R, Olson R, Pusch GD, Olsen GJ, Davis JJ, Disz T, et al. The SEED  
548 and the Rapid Annotation of microbial genomes using Subsystems Technology  
549 (RAST). *Nucleic Acids Research*. 2014;42 D1:D206-D14.
- 550 49. Arndt D, Grant JR, Marcu A, Sajed T, Pon A, Liang Y, et al. PHASTER: a better,  
551 faster version of the PHAST phage search tool. *Nucleic Acids Research*.  
552 2016;44 W1:W16-W21.
- 553 50. Bouras G, Nepal R, Houtak G, Psaltis AJ, Wormald P-J and Vreugde S.  
554 Pharokka: a fast scalable bacteriophage annotation tool. *Bioinformatics*.  
555 2023;39 1:btac776.

556

557 **Table 1.** Browsers and operating systems (OS) tested with PhageGE

| <b>OS</b>      | <b>Chrome</b> | <b>Edge</b> | <b>Firefox</b> | <b>Safari</b> |
|----------------|---------------|-------------|----------------|---------------|
| <b>Linux</b>   | 120.0         | 120.0       | 121.0          | n/a           |
| <b>MacOS</b>   | 107.0         | 108.0       | 107.0.1        | 15.6.1        |
| <b>Windows</b> | 105.0         | 108.0       | 107.0.1        | n/a           |

558 n/a, not applicable

559

560 **Table 2.** Lifestyle prediction for 8 different phages

|                  | <b>Lytic</b> | <b>Temperate</b> |
|------------------|--------------|------------------|
| <b>KP36</b>      | 0.993        | 0.007            |
| <b>FK1979</b>    | 0.956        | 0.044            |
| <b>vB8838</b>    | 0.969        | 0.031            |
| <b>pKp20</b>     | 0.974        | 0.026            |
| <b>NC_017985</b> | 0            | 1                |
| <b>NC_027339</b> | 0.002        | 0.998            |
| <b>NC_009815</b> | 0.016        | 0.984            |
| <b>NC_019768</b> | 0.01         | 0.99             |

561

562

563 **Figures legends:**

564 **Figure 1. The workflow and application of PhageGE.**

565 Illustration of the workflow of PhageGE, highlighting its components and processes for  
566 phage genomic analysis. (1) **Phylogenetic analysis.** Input: Phage genome files in  
567 fasta format are uploaded; Pre-processing: The uploaded genome files are processed  
568 to estimate parameters and the are hashed for further analysis. Distance  
569 Estimation: K-mers features are normalised and then used for Jaccard index  
570 computation. Distance estimation: Distances are estimated based on the computed  
571 Jaccard index. (2) **Visualisation.** The results are visualised using the ggtree package  
572 and sample information files in CSV format. (3) **Lifestyle Prediction.** Biosequence  
573 analysis (HMMER): Biosequence analysis is performed using HMMER. Prediction  
574 model: A prediction model based on a phage genome-lifestyle dataset is applied.  
575 Lifestyle prediction: The lifestyle of the phages is predicted with the uploaded phage  
576 genome. (4) **Annotation Comparison.** Data manipulation: Genome annotation files  
577 (phaster.txt, RAST.xls, Pharokka.gff) are manipulated with built-in functions.  
578 Annotation comparison table: An annotation comparison table is generated using built-  
579 in functions.

580 **Figure 2. Overview of PhageGE and its related functions.**

581 The main functions and item information in PhageGE are illustrated in the figure,  
582 highlighting the steps for phylogenetic analysis, tree visualisation, lifestyle prediction,  
583 and annotation comparison. **A.** Phylogenetic Analysis: Users can select the genomes  
584 of interest by uploading phage whole genome data files (.fasta), selecting the layout  
585 of the tree (i.e., phylogram, cladogram, fan, radial and tidy), and clicking the "Explore  
586 Tree" button to initiate the phylogenetic analysis. **B.** Phylogenetic Tree Visualisation:



587 Users can upload a tree file (Newick or .tre format) and related genome information  
588 file (.csv). The tree visualisation displays the phylogenetic relationships among the  
589 uploaded genomes, with detailed annotations. **C. Lifestyle Prediction:** Users can select  
590 a genome of interest for lifestyle prediction by uploading a fasta file (.fasta). By clicking  
591 the "Explore Lifestyle Prediction" button, the user can predict the lifestyle of the  
592 selected genome, displaying the results with relevant statistics. **D. Annotation**  
593 **Comparison:** Users can upload multiple annotation files (Phaster, RAST, and  
594 Pharokka) and select the type of comparison. The resulting comparison table displays  
595 the annotated features from each source, facilitating detailed comparative analysis.

596 **Figure 3. Comparison of phylogeny estimations from PhageGE and MSA.**

597 **A.** Alignment-free phylogenetic trees of 15 phages inferred from WGS data, and **B.**  
598 the topology of the reference tree inferred from multiple sequence alignment of WGS.  
599 The trees illustrate the classification and related taxa positions, demonstrating the  
600 consistency and accuracy of PhageGE's alignment-free approach in relation to the  
601 traditional MSA-based method.

602 **Figure 4. Interactive visualisation of the phylogenetic tree of 15 phages.**

603 Each coloured dot represents one phage, with the colour indicating the associated  
604 taxa. The pink box illustrates the additional information that can be obtained by  
605 hovering the cursor over each dot.

606 **Figure 5. Comparison of classification accuracy of PhageGE with previously**  
607 **published tools across all datasets analysed.**

608 Incorrect classification involves misidentifying the phage lifestyle (temperate or lytic).

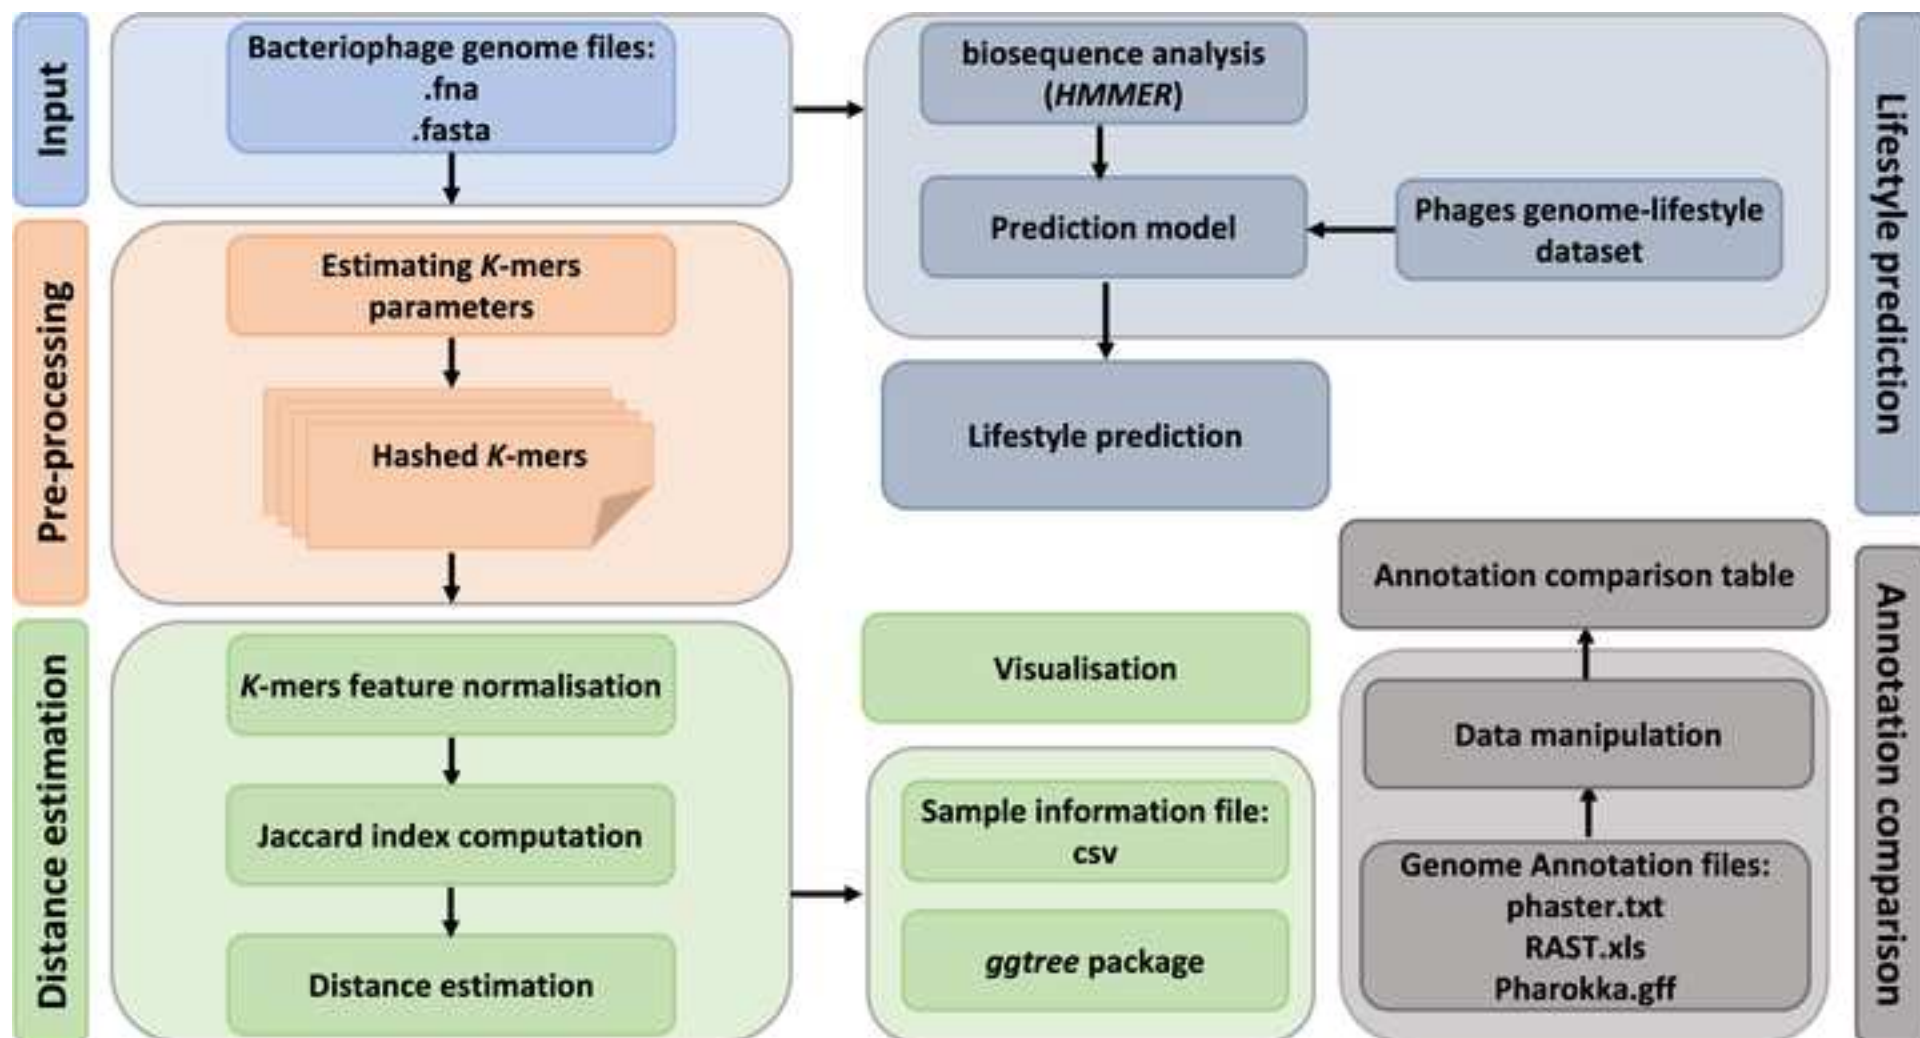

## Main functions and item info

PhageGE | [Phylogenetic analysis](#) | [Phylogenetic tree visualisation](#) | [Lifestyle prediction](#) | [Annotation comparison](#)

### Phylogenetic analysis

Select phage whole genome data (.fasta or .fastq) which you want to explore

Browser:

Select the genomes of interest → A

PhageGE | [Phylogenetic analysis](#) | [Phylogenetic tree visualisation](#) | [Lifestyle prediction](#) | [Annotation comparison](#)

### Phylogenetic tree visualisation

Upload data

Select tree file to import (.newick or .dnd)

Browser:

Select sample info file to import (.csv)

Browser:

Data visualisation

Select the tree file → B

Select the related genome information

PhageGE | [Phylogenetic analysis](#) | [Phylogenetic tree visualisation](#) | [Lifestyle prediction](#) | [Annotation comparison](#)

### Lifestyle prediction

Select fasta file to import (.fasta or .fastq)

Browser:

Select the genome of interest → C

PhageGE | [Phylogenetic analysis](#) | [Phylogenetic tree visualisation](#) | [Lifestyle prediction](#) | [Annotation comparison](#)

### Annotation comparison

Select tsv file to import (.tsv)

Browser:

Select excel file to import (.xlsx)

Browser:

Select table file to import (.gff)

Browser:

Please select the comparison type:

Common\_annotation

Select the Phaster annotation → D

Select the RAST annotation

Select the PharoKka annotation

Select the common annotation

## Analysis and visualisation

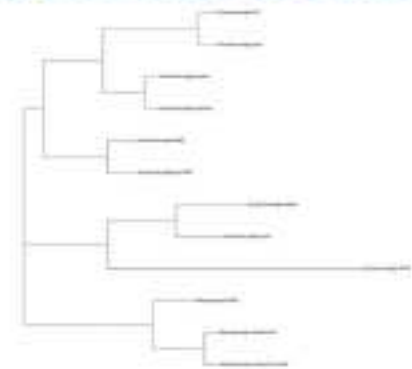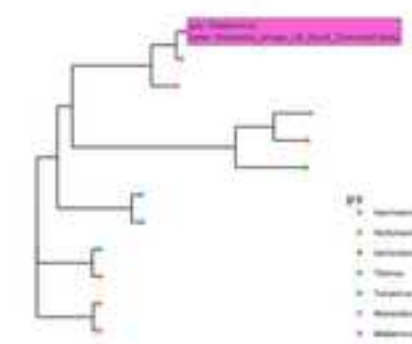

| Phage  | Accession   | Host  | Source |
|--------|-------------|-------|--------|
| Phage1 | g1171-12581 | Human | Human  |

| Gene | Start | End  | Strand | Product | Phaster     | RAST        | PharoKka    | Common      |
|------|-------|------|--------|---------|-------------|-------------|-------------|-------------|
| 1    | 1     | 100  | +      | PROTEIN | g1171-12581 | g1171-12581 | g1171-12581 | g1171-12581 |
| 2    | 101   | 200  | +      | PROTEIN | g1171-12581 | g1171-12581 | g1171-12581 | g1171-12581 |
| 3    | 201   | 300  | +      | PROTEIN | g1171-12581 | g1171-12581 | g1171-12581 | g1171-12581 |
| 4    | 301   | 400  | +      | PROTEIN | g1171-12581 | g1171-12581 | g1171-12581 | g1171-12581 |
| 5    | 401   | 500  | +      | PROTEIN | g1171-12581 | g1171-12581 | g1171-12581 | g1171-12581 |
| 6    | 501   | 600  | +      | PROTEIN | g1171-12581 | g1171-12581 | g1171-12581 | g1171-12581 |
| 7    | 601   | 700  | +      | PROTEIN | g1171-12581 | g1171-12581 | g1171-12581 | g1171-12581 |
| 8    | 701   | 800  | +      | PROTEIN | g1171-12581 | g1171-12581 | g1171-12581 | g1171-12581 |
| 9    | 801   | 900  | +      | PROTEIN | g1171-12581 | g1171-12581 | g1171-12581 | g1171-12581 |
| 10   | 901   | 1000 | +      | PROTEIN | g1171-12581 | g1171-12581 | g1171-12581 | g1171-12581 |

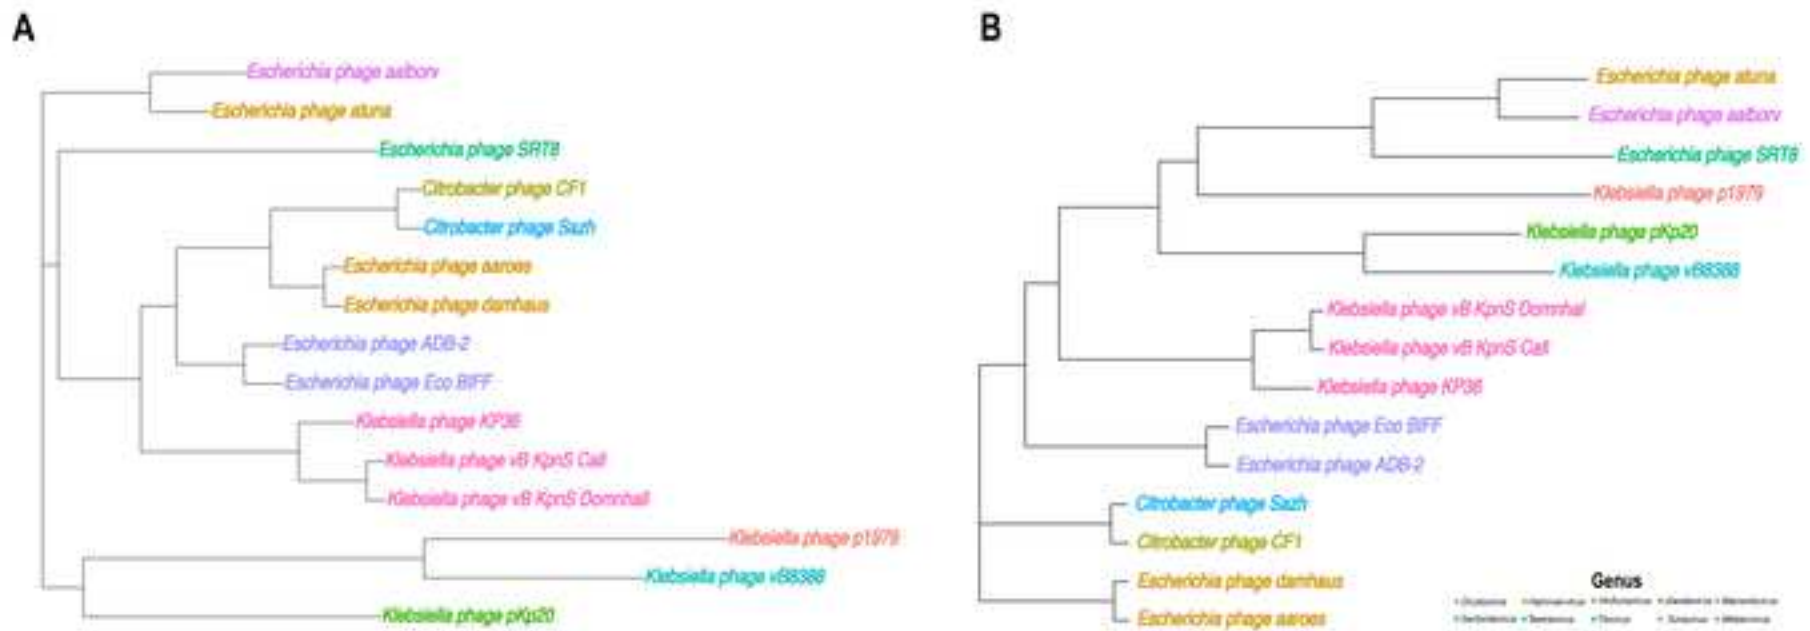

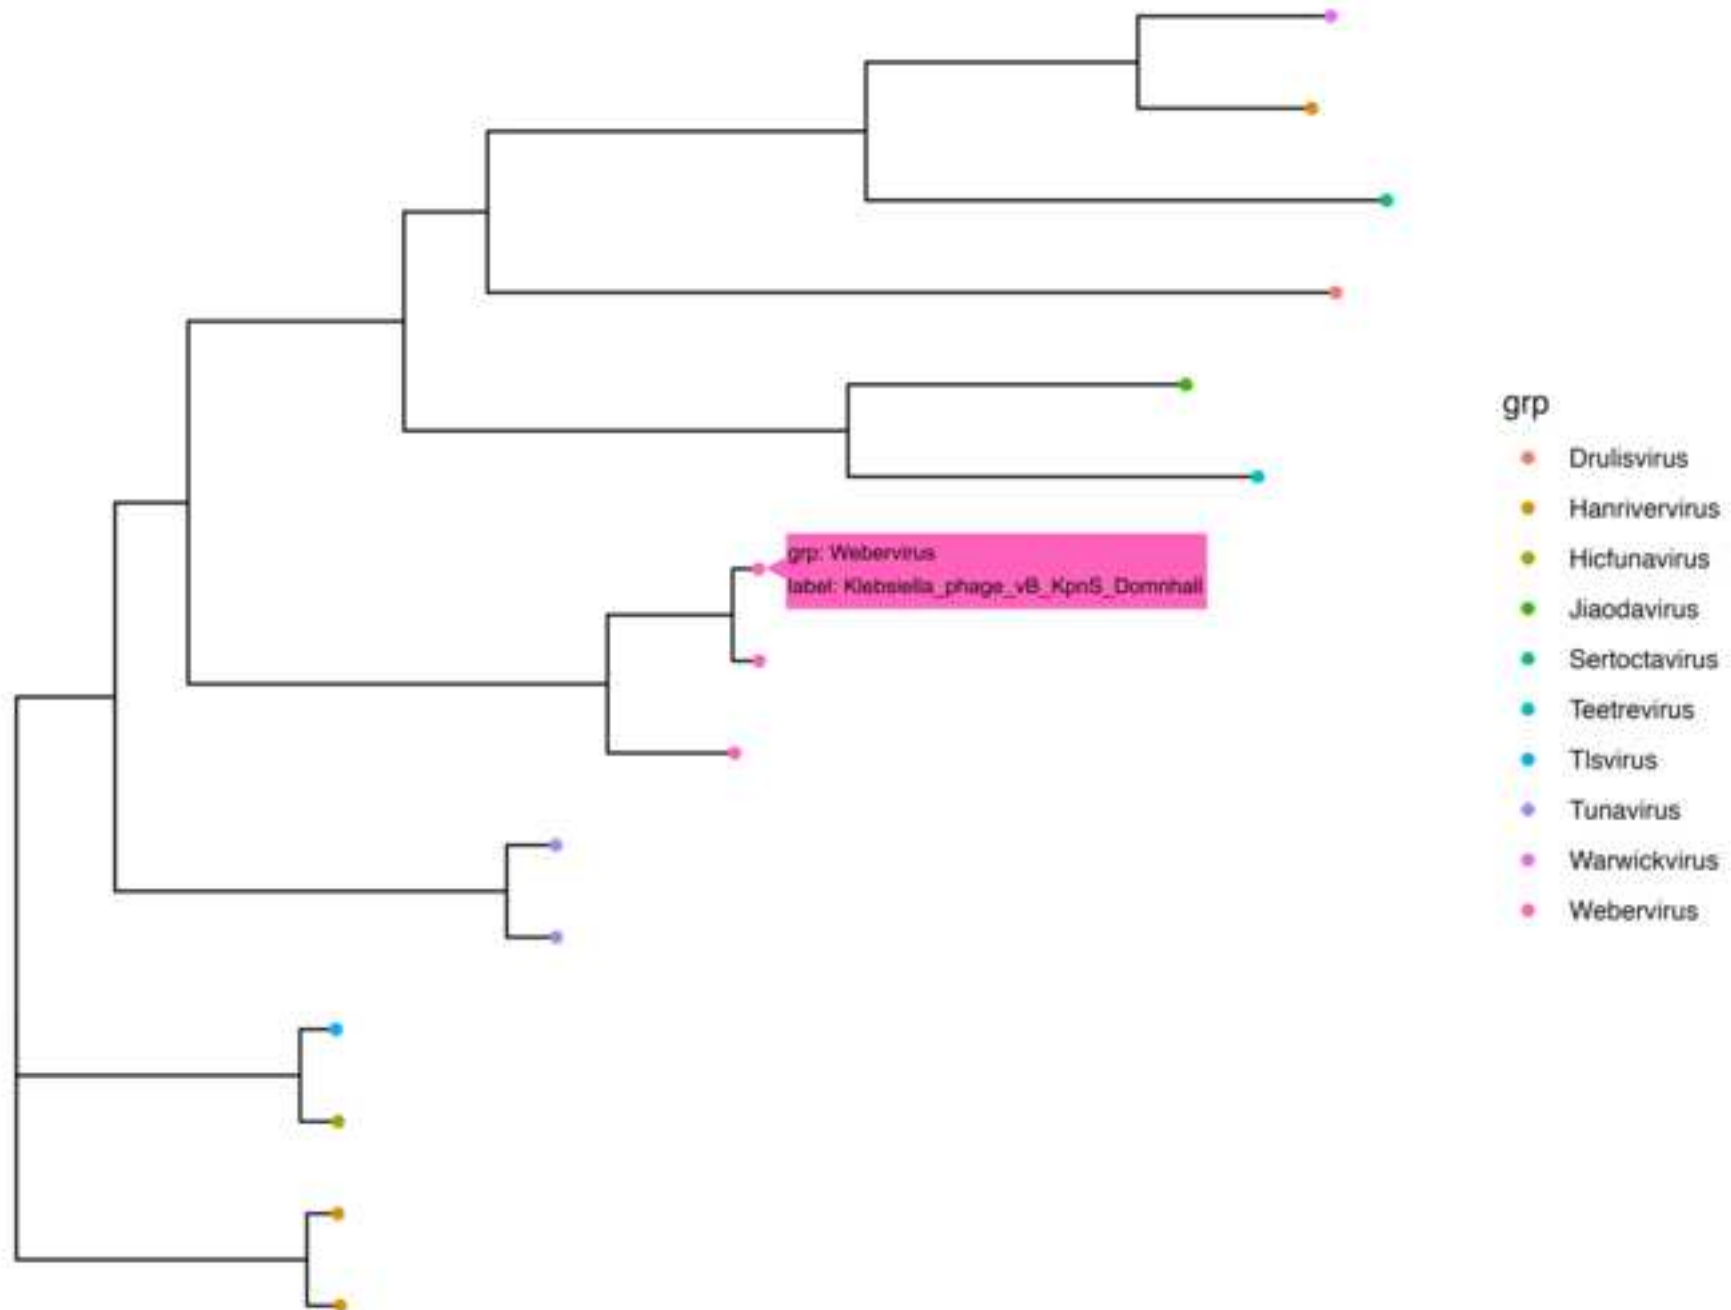

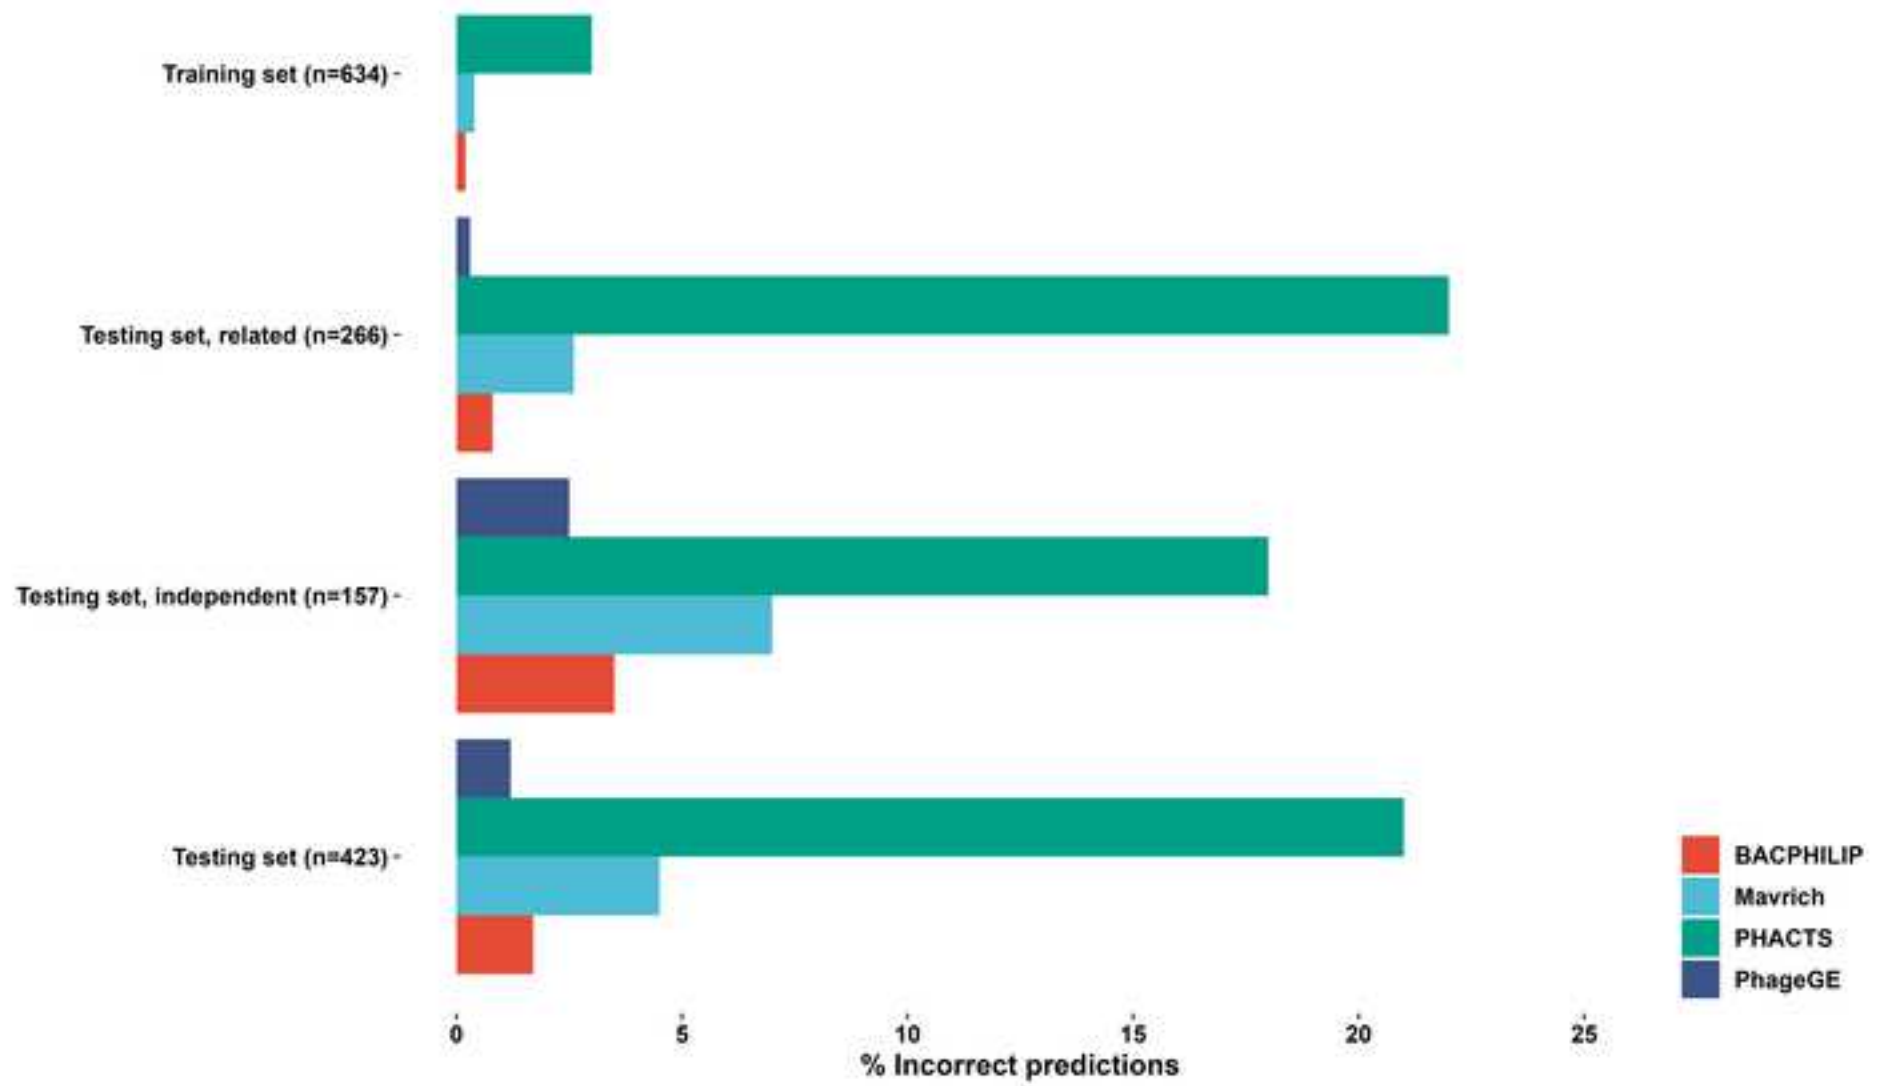

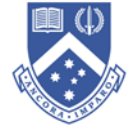

Professor Jian Li  
Fellow of the American Academy of Microbiology  
Head, Laboratory of Antimicrobial Systems Pharmacology  
Monash Biomedicine Discovery Institute

Dr Scott Edmunds  
Editor-in-Chief  
*GigaScience*

August 19<sup>th</sup>, 2024

**Re: Manuscript GIGA-D-24-00040R1**

Dear Dr Edmunds,

Thank you for providing the reviewers' comments on our manuscript "*PhageGE: An interactive web platform for exploratory analysis and visualisation of bacteriophage genomes*" and for the opportunity to revise it. Please find below our point-by-point responses to the editor and reviewers' comments. For your convenience, all major changes have been highlighted in yellow. Line numbers mentioned in our responses below refer to the marked-up version of the manuscript.

Thank you and we are looking forward to your final decision.

Yours sincerely,



Jian Li PhD

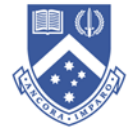

Professor Jian Li  
Fellow of the American Academy of Microbiology  
Head, Laboratory of Antimicrobial Systems Pharmacology  
Monash Biomedicine Discovery Institute

## Point-by-point responses

### Reviewers' comments:

#### Reviewer1:

1. I think it's important to state upfront in the abstract what phageGE can do (i.e., phylogenetic analysis, visualisation of phylo tree, predict phage lifecycle, and comparative analysis of phage genome annotations).

**Response:** We thank the reviewer for the suggestion. We have revised the abstract accordingly (lines 49-59).

2. Please include a link to the phageGE webpage in the abstract.

**Response:** We thank the reviewer for the suggestion and have provided the webpage in the abstract (line 59).

3. Spelling mistakes throughout the manuscript - as an example L288: comprehensive

**Response:** We thank the reviewer for the suggestion and have carefully checked our manuscript (line 228).

4. .fna and .fasta are the same format. i.e., fna is a type of FASTA file. fna specifies that the fasta file specifically contains nucleotides (instead of amino acids).

**Response:** We thank the reviewer for the suggestion and have revised our manuscript accordingly (lines 122, 590).

5. change "biologist friendly" to "User friendly" - this is more a philosophical/psychological change. I think bioinformatics on the command-line should be accessible and something biologists can develop. I think calling GUI programs "biologist-friendly" will deter more biologists from learning bioinformatics.

**Response:** We thank the reviewer for the suggestion. We have revised our manuscript accordingly, with changes made on lines 49, 89, 97, 219, and 261.
