# Supplementary material for: PhageGE: an interactive web platform for exploratory analysis and visualization of bacteriophage genomes
Source: PubMed Central journal article supplement (PMC11423353; doi:10.1093/gigascience/giae074), 2024-09-25
Supplement: giae074_reviewer_1_report_original_submission.pdf [file giae074_reviewer_1_report_original_submission.pdf]

## Reviewer Report

**Title: PhageGE: An interactive web platform for exploratory analysis and visualisation of bacteriophage genomes**

**Version: Original Submission    Date: 2/18/2024**

**Reviewer name: Andre Mu**

### Reviewer Comments to Author:

PhageGE: An interactive web platform for exploratory analysis and visualisation of bacteriophage genomes Zhao et al. The authors report here a new web-based tool called Phage Genome Explorer (PhageGE) for the interactive analysis of phage genomic data, which facilitates phylogenetic analysis and visualisation, the prediction of lytic vs., lysogenic lifestyles, and the interrogation of data generated by genome annotation tools (e.g., PharoKka). I commend the authors for developing this user-friendly tool that allows for greater access to non-experts. I believe this tool will have utility across clinical research and basic phage biology. I've tested the tool using both author supplied test data and data I've generated, and I have no major comments about the results and usability of PhageGE. However, I believe additional revisions are needed to strengthen the overall manuscript.

- 1) I would like to see the option to upload multi-fasta files implemented as a means to streamline usability. I think this can be implemented for both "phylogenetic analysis" and "lifestyle prediction" sections. The code below may work:

```
# Read the multi-fasta file
fasta <- readLines("input_multifasta.fna")
# Initialize variables
OUT <- NULL
current_sequence <- NULL
# Process each line in the multi-fasta file
for (line in fasta) {
  if (grepl("^>", line)) {
    # If line starts with ">" then it is a header
    header <- gsub("[^a-zA-Z0-9]+", "_", substr(line, 2, nchar(line)))
    perl = TRUE
    OUT <- paste0(header, ".fna")
    write("", file = OUT)
    # Create an empty output file
  } else {
    # Otherwise, the line is sequence data
    if (is.null(OUT)) {
      stop("Error: No header found before sequence data.")
    }
    write(line, file = OUT, append = TRUE)
    # Append sequence data to output file
  }
}
```
- 2) How does PhageGE scale to large metagenomic datasets? Unfortunately, I was unable to test this without the multi-fasta input option. However, I think it could scale nicely, especially with a circular tree format.
- 3) Viral clusters have been shown to be important in determining viral diversity, and I think it would be a useful addition to the phylogenetic-based analyses. c.f., Camarillo-Guerrero et al., 2021. PMID: 33606979 and rBlast <https://github.com/mhahsler/rBLAST4>

4) On the "Phylogenetic analysis" landing page, I think "select phage whole genome data" should read "select phage genome data" as whole genome data would imply that phage particles were isolated and sequenced. The following comments are with regards to the body of the manuscript. "This demonstrates that the phylogenetic analysis performance of PhageGE is accurate and comparable to the multiple sequence alignment-based approach." And "It has demonstrated the ability to accurately reconstruct biologically relevant phylogenies with thousands of microbial genomes [40-42]. The description of this function is briefly outlined below." "How do phylogenies obtained using whole phage genomes (k-mer, ANI, or otherwise) compare to those reconstructed using the large terminase gene?" Furthermore, combining whole-genome sequencing (WGS) with in silico prediction enables rapid prediction of phage life style [18]. Several popular bioinformatic pipelines and tools are available for such analyses, including MAFFT, RAXML and IQ-TREE



### **Level of Interest**

Please indicate how interesting you found the manuscript: Choose an item.

### **Quality of Written English**

Please indicate the quality of language in the manuscript: Choose an item.

### **Declaration of Competing Interests**

Please complete a declaration of competing interests, considering the following questions:

- Have you in the past five years received reimbursements, fees, funding, or salary from an organisation that may in any way gain or lose financially from the publication of this manuscript, either now or in the future?
- Do you hold any stocks or shares in an organisation that may in any way gain or lose financially from the publication of this manuscript, either now or in the future?
- Do you hold or are you currently applying for any patents relating to the content of the manuscript?
- Have you received reimbursements, fees, funding, or salary from an organization that holds or has applied for patents relating to the content of the manuscript?
- Do you have any other financial competing interests?
- Do you have any non-financial competing interests in relation to this paper?

If you can answer no to all of the above, write 'I declare that I have no competing interests' below. If your reply is yes to any, please give details below.

I declare that I have no competing interests

I agree to the open peer review policy of the journal. I understand that my name will be included on my report to the authors and, if the manuscript is accepted for publication, my named report including any attachments I upload will be posted on the website along with the authors' responses. I agree for my report to be made available under an Open Access Creative Commons CC-BY license (<http://creativecommons.org/licenses/by/4.0/>). I understand that any comments which I do not wish to be included in my named report can be included as confidential comments to the editors, which will not be published.

Choose an item.

To further support our reviewers, we have joined with Publons, where you can gain additional credit to further highlight your hard work (see: <https://publons.com/journal/530/gigascience>). On publication of

this paper, your review will be automatically added to Publons, you can then choose whether or not to claim your Publons credit. I understand this statement.

Yes Choose an item.
